# Supplementary material for: Shiftless Is a Novel Member of the Ribosome Stress Surveillance Machinery That Has Evolved to Play a Role in Innate Immunity and Cancer Surveillance
Source: MDPI journal article supplement (doi:10.3390/v15122296), 2023-11-23
Supplement: s1 [file s1]

## Supplemental Materials

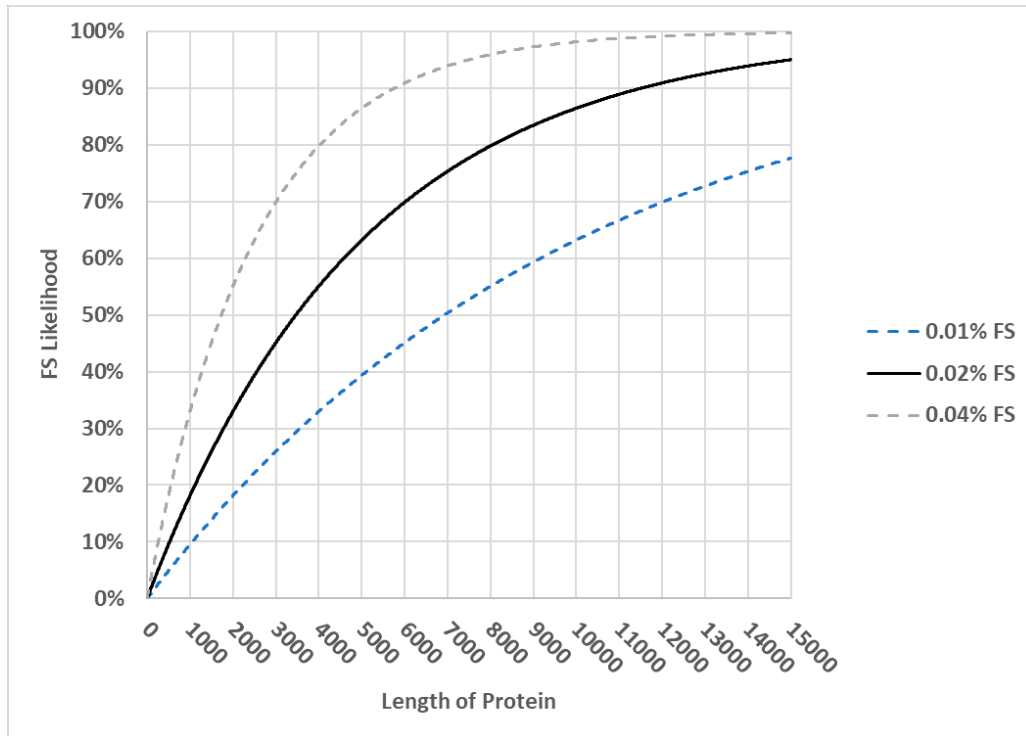

**Supplemental Figure S1. Probability plot of the likelihood of a spontaneous ribosomal frameshift as a function of codon length.** The plot was calculated with Excel using the following equation:  $P = 1 - ((1 - \text{rate of spontaneous frameshifting})^{\text{amino acid length}})$ .

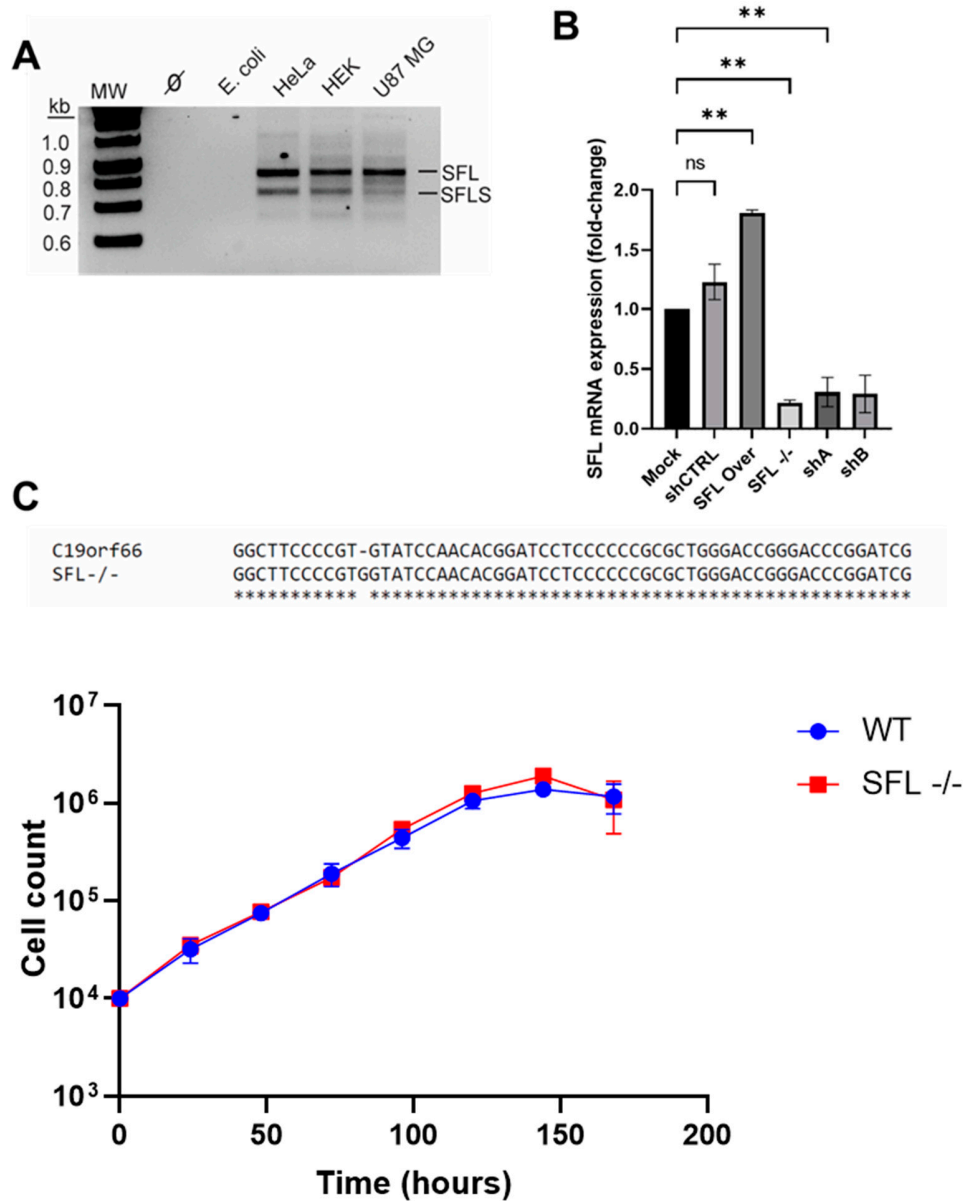

**Supplemental Figure S2. Modifying SFL expression in the cell.**

**A.** RT-PCR analysis of SFL in a blank sample (Ø), and RNA extracted from *E. coli*, HeLa, HEK293T and U87 MG cells. SFL denotes the full-length Shiftless mRNA while SFLS denotes a shorter Shiftless splice isoform. **B.** qRT-PCR analysis of SFL expression in HEK293T cells. **C.** Sequence validation of SFL<sup>-/-</sup> HEK293T cells. Yellow box indicates insertion of a G residue into the SFL coding sequence by CRISPR. **D.** SFL knockout does not alter cell growth. Growth curve of WT HEK293T cells (blue) and SFL<sup>-/-</sup> HEK293T cells (red).

A

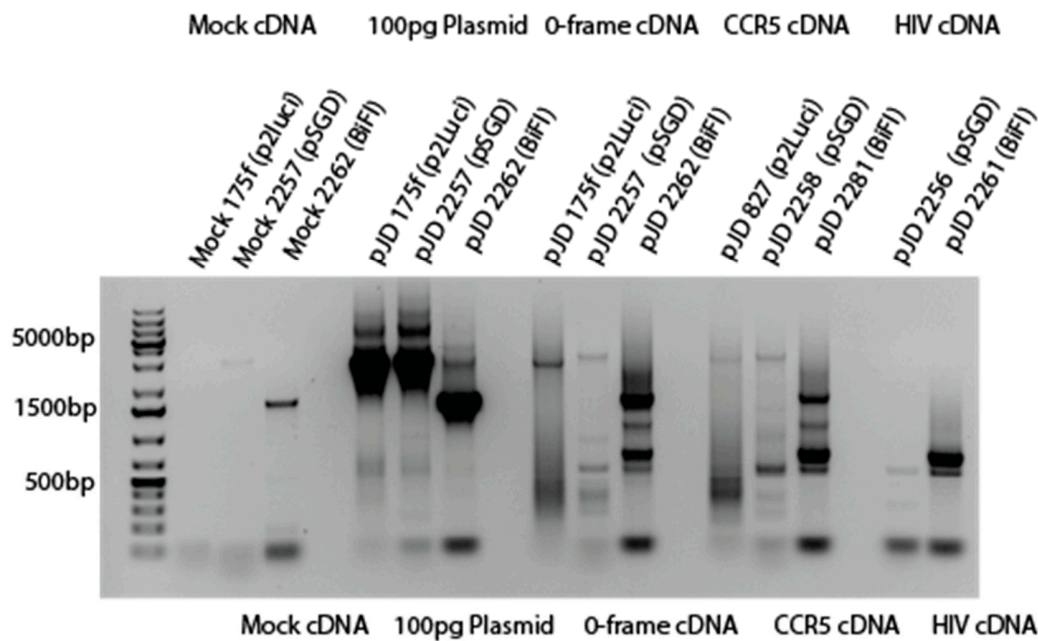

B

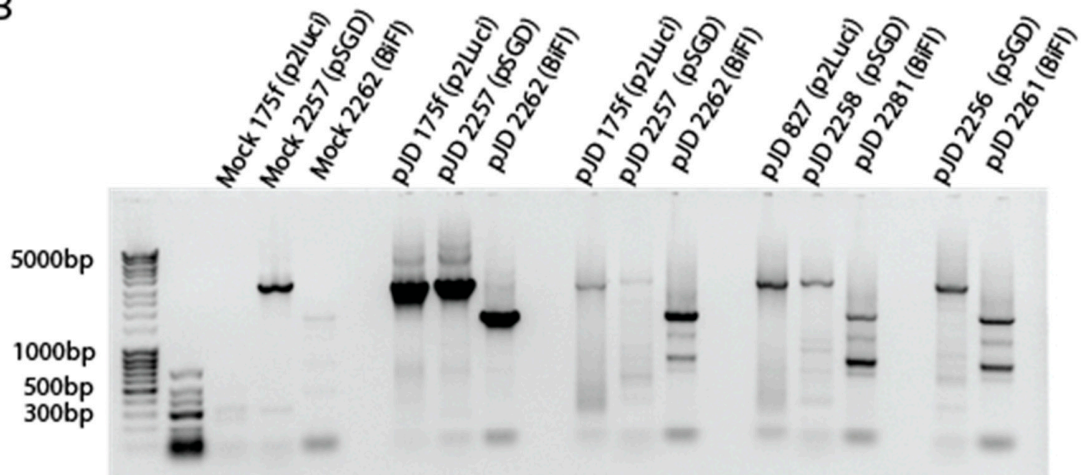

**Supplemental Figure S3. Assessment of reporter splicing.** RT-PCR analysis of plasmid DNA controls or mRNA extracted from HEK293T cells expressing first-generation dual luciferase (p2Luci), second-generation dual luciferase (pSGD), or bifluorescent (BiFI) reporters containing a 0-frame control, CCR5 -1 frameshift element, or HIV-1 -1 frameshift element and analyzed by gel electrophoresis. A and B denote two independent replicates.

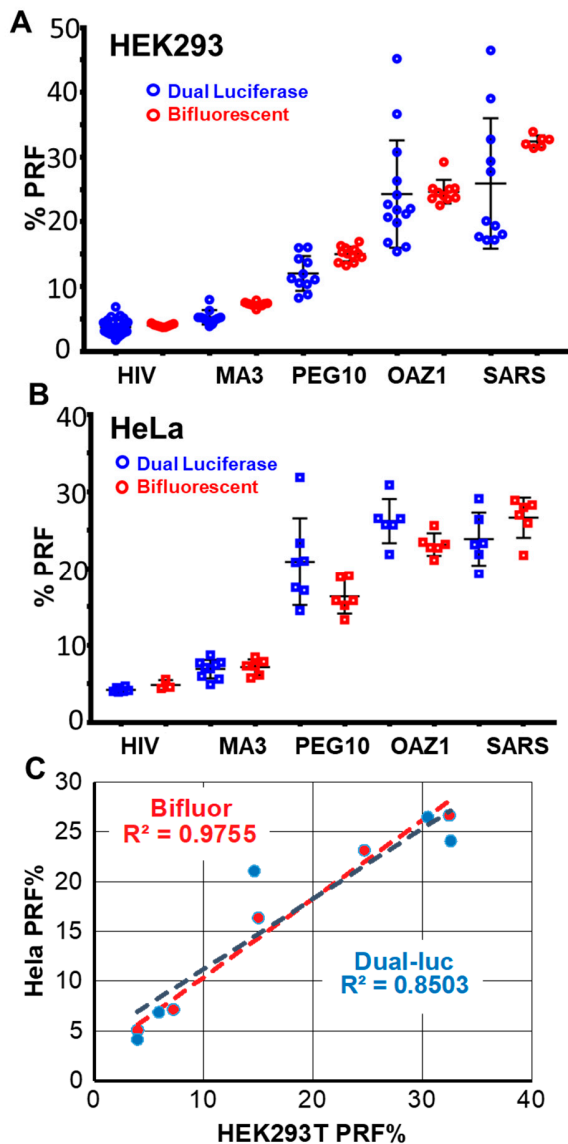

**Supplemental Figure S4.** Comparison of translational recoding measured with dual luciferase and bifluorescent reporters.

**A, B:** -1 PRF (HIV, MA3, PEG10, SARS) and +1 PRF (OAZ1) were measured in HEK93 or HeLa cells as indicated. Each dot indicates three technical replicates of one independent biological replicate. Bars indicate standard error. **C:** Linear regression analyses of the data compared between the two assay systems.

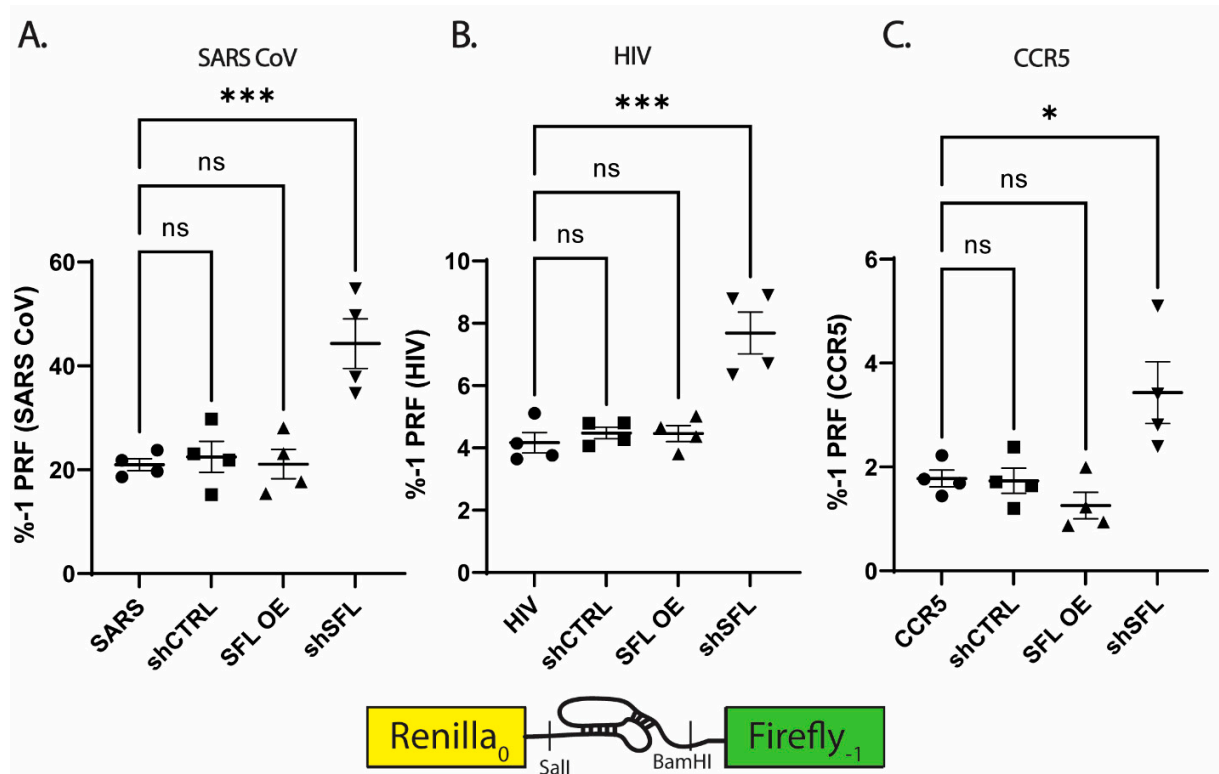

**Supplemental Figure S5. SFL overexpression or knockdown alters -1 PRF.**

Frameshift efficiency of three translational recoding elements measured using dual luciferase reporters in HEK293T cells over or under-expressing SFL. (A) SARS-CoV -1 PRF signal, (B) HIV-1 -1 PRF signal, (C) CCR5 -1 PRF signal.

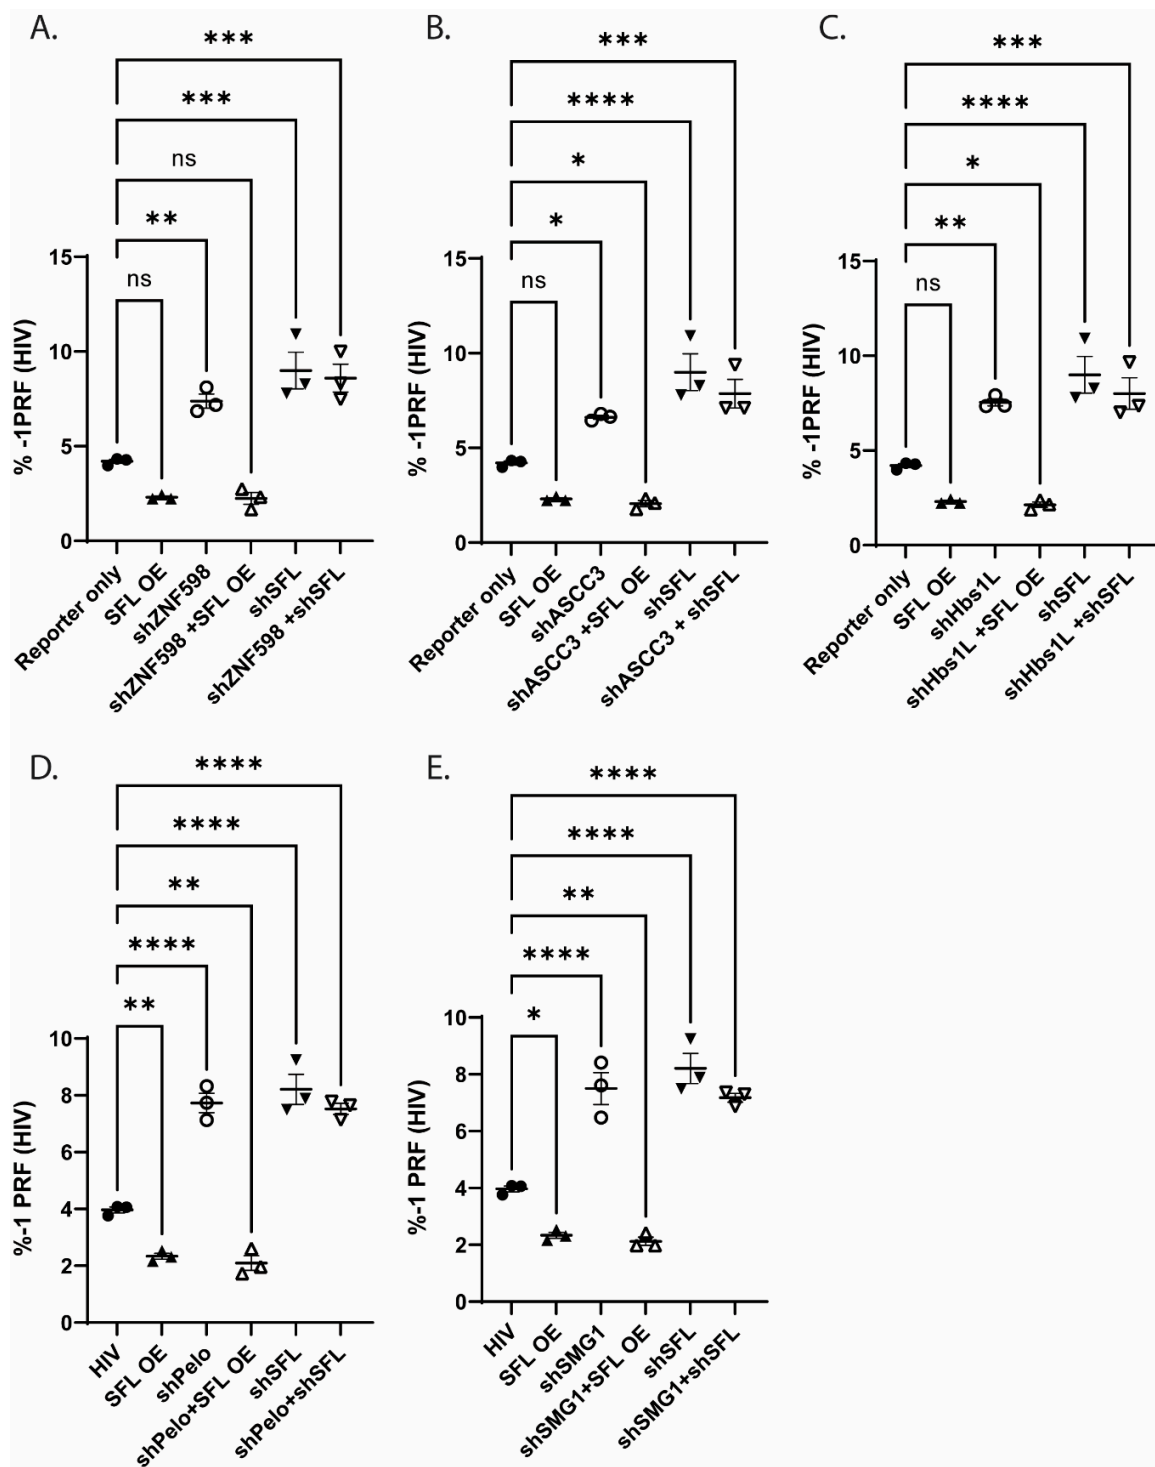

**Supplemental Figure S6.**

Frameshift efficiency of the HIV-1 -1 PRF signal in HEK293T cells over or under-expressing SFL in combination with shRNA knockdown of (A) ZNF598, (B) ASCC3, (C) Hbs1L, (D) Pelota, (E) SMG1.

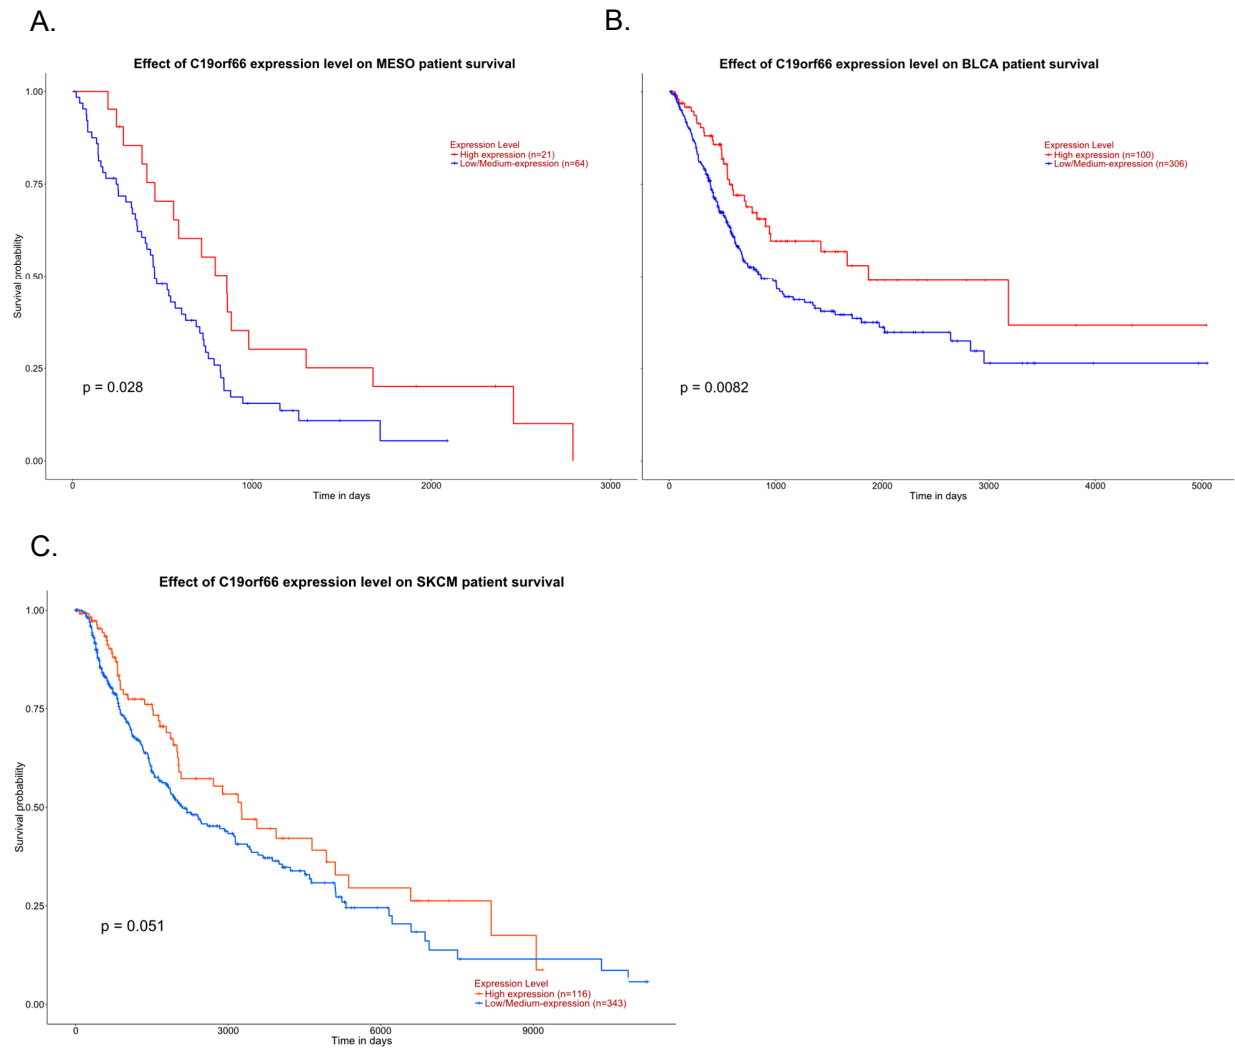

**Supplemental Figure S7. Lower SFL expression decreases cancer patient survival.**

Kaplan-Meier survival plots comparing low and high-level Shiftless expression in (A) Lung mesothelioma, (B) Bladder urothelial carcinoma, and (C) Cutaneous melanoma.

|                | Normal   |          |     | Cancer   |          |      | Expression Change |          |
|----------------|----------|----------|-----|----------|----------|------|-------------------|----------|
|                | Mean TPM | SD       | N   | Mean TPM | SD       | N    | Fold mean         | % Change |
| Bladder (BLCA) | 19.348   | 3.791429 | 9   | 12.09574 | 7.454498 | 432  | 0.625167          | -37.4833 |
| Breast         | 18.40608 | 6.584216 | 181 | 7.722593 | 5.202915 | 1253 | 0.419568          | -58.0432 |
| Colon          | 23.36609 | 9.238391 | 141 | 5.811777 | 4.246281 | 543  | 0.248727          | -75.1273 |
| Kidney (RCC)   | 20.41811 | 15.46794 | 28  | 8.765442 | 5.709652 | 615  | 0.429297          | -57.0703 |
| Liver          | 68.51388 | 24.48586 | 110 | 19.12129 | 11.57723 | 422  | 0.279086          | -72.0914 |
| Lung (MESO)    | 28.0186  | 10.74209 | 295 | 14.38403 | 6.311042 | 87   | 0.513374          | -48.6626 |
| Lung (LUAD)    | 28.0186  | 10.74209 | 295 | 8.378763 | 4.990853 | 598  | 0.299043          | -70.0957 |
| Prostate       | 30.51811 | 10.45481 | 100 | 6.631655 | 3.429536 | 556  | 0.217302          | -78.2698 |
| Skin (SKCM)    | 9.825529 | 3.824696 | 325 | 12.23792 | 7.540857 | 470  | 1.245522          | 24.55225 |
| Average all    |          |          |     |          |          |      | 0.475232          | -52.4768 |

**Supplementary Table S1. Shiftless expression in common cancers.**

Average transcripts per million reads (TPM) of Shiftless in Normal or cancerous tissues. Data mined from Genome Browser [1].

1. Lee, B.T.; Barber, G.P.; Benet-Pagès, A.; Casper, J.; Clawson, H.; Diekhans, M.; Fischer, C.; Gonzalez, J.N.; Hinrichs, A.S.; Lee, C.M.; et al. The UCSC Genome Browser Database: 2022 Update. *Nucleic Acids Res.* **2022**, *50*, doi:10.1093/nar/gkab959.
