# Supplementary material for: Shiftless Is a Novel Member of the Ribosome Stress Surveillance Machinery That Has Evolved to Play a Role in Innate Immunity and Cancer Surveillance
Source: Viruses. 2023 Nov 23;15(12):2296. doi: 10.3390/v15122296 (PMC10747187; doi:10.3390/v15122296)
Supplement: Supplementary file 1 [file viruses-15-02296-s001.zip › Suppl Data Set S1_Shiftless reporter data-all.xlsx]

## Sheet: CCR5-DLA
Experiment	Sample	Firefly	Renilla	Ratio	Average	SD	%			% -1PRF						Fold change
DLA010	CCR5 CTRL	6993010	580219000	0.0120524	0.013956	0.00336736	1.63668				CCR5 only	shCTRL	SFL	shSFL		CCR5 only	shCTRL	SFL	shSFL
		7044160	588406000	0.0119716			0					1.63668	0.938895	2.81098		#DIV/0!	#DIV/0!	#DIV/0!	#DIV/0!
		10474200	586987000	0.017844			0				2.22268	2.3822	1.99178	5.10362		1	1.07177	0.896113	2.29616
	CCR5 SFL	375701	49598000	0.00757492	0.00800597	0.000623438	0.938895					3.69938	3.16126	3.24429		#DIV/0!	#DIV/0!	#DIV/0!	#DIV/0!
		393800	50996000	0.00772217			0					1.32449	1.0265	1.52464		#DIV/0!	#DIV/0!	#DIV/0!	#DIV/0!
		438072	50232900	0.00872082			0				1.4445	1.71312	1.22763	3.40778		1	1.18596	0.849865	2.35915
	CCR5142	3096270	135848000	0.0227922	0.0239692	0.00322168	2.81098				0.65107	0.863787	0.615369	1.956		1	1.32672	0.945166	3.00428
		2948000	137106000	0.0215016			0				1.7654	1.20474	0.873789	2.39928		1	0.682419	0.494953	1.35906
		3883540	140637000	0.0276139			0				0.96732	1.01049	0.969048	1.74262		1	1.04463	1.00179	1.8015
DLA012	CCR5 CTRL	11414500	800550000	0.0142583	0.0160883	0.00301297	2.3822	2.37567			0.777242	1.12608	0.676	2.59074		1	1.44882	0.869742	3.33324
		11385300	788411000	0.0144408				0			0.846761	0.880127	0.780803	1.65639		1	1.0394	0.922106	1.95614
		13176500	673446000	0.0195658				0			0.572567	0.829386	0.722513	2.41076		1	1.44854	1.26188	4.21044
	CCR5 SFL	781280	57279200	0.0136399	0.0134516	0.000411706	1.99178	1.98631
		754486	58129600	0.0129794				0			CCR5 only	shCTRL	SFL	shSFL		CCR5 only	shCTRL	SFL	shSFL
		782948	57002000	0.0137354				0		Average %	1.15594	1.5155	1.18033	2.62246	Average Fold	1	1.15603	0.905202	2.54
	CCR5 142	6278300	161306000	0.0389217	0.0344676	0.00399571	5.10362	5.08963		SD	0.593108	0.539046	0.45162	1.13451	SD	0	0.255996	0.210828	0.926455
		5042090	161615000	0.0311982				0
		5275550	158506000	0.033283				0
	CCR5	13203700	874265000	0.0151026	0.015011	0.000124914	2.22268	2.21659
		14341900	952212000	0.0150617				0
		14103500	948535000	0.0148687				0
DLA016	CCR5 CTRL	1176340	71852000	0.0163717	0.0152319	3.69938
		1049480	72075200	0.0145609
		1054060	71398900	0.014763
	CCR5 SFL	992233	75197700	0.013195	0.0130162	3.16126
		946554	75667300	0.0125094
		1005600	75358500	0.0133442
	CCR5 142	1608870	104986000	0.0153246	0.0133581	3.24429
		1320360	105519000	0.012513
		1269960	103784000	0.0122366
DLA018	CCR5 CTRL	566823	53969100	0.0105027	0.0104082	1.32449
		567995	55191800	0.0102913
		578003	55413600	0.0104307
	CCR5 SFL	476782	57335900	0.00831559	0.00806656	1.0265
		459176	56692700	0.00809938
		408819	52515700	0.0077847
	CCR5 142	590354	46462600	0.012706	0.0119811	1.52464
		586019	49269100	0.0118943
		559337	49311000	0.011343
DLA020	CCR5 CTRL	858320	143852000	0.00596669	0.00623139	1.71312
		889547	135126000	0.00658309		0
		782875	127413000	0.00614439		0
	CCR5 SFL	238578	51236700	0.00465639	0.00446544	1.22763
		231831	52325700	0.00443054		0
		222401	51608600	0.00430938		0
	CCR5 142	328950	24528500	0.0134109	0.0123956	3.40778
		320693	25897300	0.0123833		0
		289221	25386500	0.0113927		0
	CCR5 only	6104840	1216360000	0.00501894	0.00525429	1.4445
		7821700	1300720000	0.00601336		0
		5883830	1243790000	0.00473057		0
DLA022	CCR5 CTRL	1030270	183424000	0.00561688	0.00497137	0.863787
		881008	183558000	0.00479962
		820679	182470000	0.00449761
	CCR5 SFL	219041	65399900	0.00334926	0.00354165	0.615369
		215144	64022300	0.00336045
		245680	62749900	0.00391523
	CCR5 142	387017	33946400	0.0114008	0.0112574	1.956
		405541	35134000	0.0115427
		394039	36388700	0.0108286
	CCR5 Only	5606690	1556190000	0.00360283	0.00374711	0.65107
		6611100	1559000000	0.0042406
		5565500	1637920000	0.00339791
DLA031	CCR5	1770880	164393000	0.0107722	0.0093473	1.7654
		1457550	166196000	0.00877007
		1426580	167841000	0.00849959
	C CTRL	648787	104433000	0.00621247	0.00637877	1.20474
		696357	105714000	0.00658718
		674417	106431000	0.00633666
	C SFL	115927	27786500	0.00417206	0.00462647	0.873789
		136895	27428900	0.0049909
		134471	28511100	0.00471644
	C1	257467	21016900	0.0122505	0.0127035	2.39928
		266469	21576000	0.0123503
		292949	21684000	0.0135099
DLA035	CCR5	3272630	826518000	0.00395954	0.00406285	0.96732
		3464710	862521000	0.00401696		0
		3589180	852119000	0.00421206		0
	CCR5 ctrl	1673010	385430000	0.00434063	0.00424417	1.01049
		1567590	389596000	0.00402363		0
		1696520	388375000	0.00436825		0
	CCR5 SFL	1822870	422478000	0.00431471	0.00407011	0.969048
		1575390	392036000	0.00401848		0
		1608880	414966000	0.00387714		0
	CCR5 shA	1839260	257917000	0.00713121	0.00731922	1.74262
		1906150	255830000	0.00745085		0
		1836500	248997000	0.00737559		0
DLA036	CCR5	1520940	519886000	0.00292553	0.00278297	0.777242
		1420080	512433000	0.00277125		0
		1305290	492167000	0.00265213		0
	CCR5 ctrl	1003830	237714000	0.00422285	0.00403202	1.12608
		998444	245182000	0.00407226		0
		939258	247111000	0.00380096		0
	CCR5 SFL	152032	65910900	0.00230663	0.00242046	0.676
		163786	69286500	0.00236389		0
		166228	64159200	0.00259087		0
	CCR5 shA	391792	42796900	0.00915468	0.0092763	2.59074
		326091	35200200	0.0092639		0
		409565	43522900	0.00941033		0
DLA037	CCR5	2089020	649251000	0.00321758	0.00290565	0.846761
		2436600	873269000	0.00279021		0
		2430300	897065000	0.00270917		0
	CCR5 ctrl	1285360	408661000	0.0031453	0.00302015	0.880127
		1159420	420970000	0.00275416		0
		1270970	402080000	0.00316099		0
	CCR5 SFL	289011	106996000	0.00270114	0.00267932	0.780803
		312232	115813000	0.002696		0
		326878	123779000	0.00264082		0
	CCR5 shA	392660	79540200	0.00493662	0.00568388	1.65639
		578027	93941700	0.00615304		0
		590181	98991000	0.00596197		0
DLA038	CCR5	3236460	976040000	0.00331591	0.00314739	0.572567
		2958340	964667000	0.0030667		0
		2849130	931225000	0.00305955		0
	CCR5 ctrl	1204110	266927000	0.00451101	0.00455911	0.829386
		1381060	288706000	0.00478362		0
		1272170	290270000	0.00438271		0
	CCR5 SFL	220223	54592500	0.00403394	0.00397164	0.722513
		231840	58383600	0.00397098		0
		229522	58701500	0.00390999		0
	CCR5 shA	620175	48289200	0.0128429	0.0132519	2.41076
		644731	51397400	0.012544		0
		761154	52973100	0.0143687		0

## Sheet: CCR5-BiFl
Expt	Sample	mCherry	GFP	GFP bleedover Cor	mCh corV	cor mCh	cor GFP	Ratio	%		%						Fold
BiFl002	CCR5	65.7653	10222.9	38.6863	27.079	13.4677	9596.84	0.00140334	1.60606			CCR5 only	shCTRL	SFL	shSFL		CCR5	CTRL	SFL	shSFL
	CCR5 Ctrl	55.3731	5870.06	32.4105	22.9626	9.3513	5244	0.00178324	2.04083			1.60606	2.04083	1.14474	3.08345		1	1.27071	0.712761	1.91988
	CCR5 SFL	49.737	5243.49	31.5071	18.2299	4.61858	4617.43	0.00100025	1.14474			1.83528	1.96212	0.976062	3.39684		1	1.06911	0.531834	1.85086
	CCR5 142	45.9499	2436.68	27.4603	18.4896	4.87828	1810.62	0.00269425	3.08345			1.84318	1.60712	0.731582	2.39425		1	0.87193	0.396913	1.29897
BiFl006	CCR5	62.7278	10226.9	38.6921	24.0357	10.7719	9562.22	0.00112651	1.83528				1.7047	1.32461	2.29065		#DIV/0!	1	0.777033	1.34372
	CCR5 shCTRL	54.5621	6859.68	33.8373	20.7248	7.46103	6195	0.00120436	1.96212
	CCR5 SFL	50.2028	6560.9	33.4065	16.7963	3.53251	5896.22	0.000599114	0.976062		Average %	1.76151	1.8287	1.04425	2.7913	Average Fold	1	1.07058	0.547169	1.68991
	CCR5 A	46.7848	3107.57	28.4276	18.3572	5.09344	2442.89	0.00208501	3.39684		SD	0.134676	0.205972	0.252395	0.535515	SD	0	0.199392	0.158481	0.34031
BiFl008	CCR5 CTRL	51.7672	4464.23	30.3836	21.3836	4.36549	3795.14	0.00115029	1.60712
	CCR5 SFL	52.748	6173.35	32.8478	19.9003	2.88216	5504.27	0.000523623	0.731582
	CCR5 A	49.6608	3119.08	28.4442	21.2166	4.19845	2449.99	0.00171366	2.39425
BiFl009	CCR5	54.4534	5581.57	31.9946	22.4588	7.3279	5011	0.00146236	1.84318
	CCR5 CTRL	49.8546	4132.79	29.9057	19.9488	4.81788	3562.21	0.0013525	1.7047
	CCR5 SFL	45.3837	2770.17	27.9411	17.4426	2.31162	2199.59	0.00105093	1.32461
	CCR5 A	44.8524	2089.86	26.9603	17.8921	2.76112	1519.29	0.00181738	2.29065

## Sheet: HIV-DLA
	Sample	Firefly	Renilla	Ratio	Average	SD	%		All reps %						Fold change
DLA010	HIV CTRL	32291300	1706920000	0.0189179	0.0178985	0.00114261	2.09903			HIV only	shCTRL	SFL	shSFL		HIV only	shCTRL	SFL	shSFL
		28086000	1685490000	0.0166634			0				2.09903	2.373	3.4071		#DIV/0!	#DIV/0!	#DIV/0!	#DIV/0!
		31090000	1716330000	0.0181142			0			3.81012	2.68515	3.00975	5.50361		1	0.704741	0.789936	1.44447
	HIV SFL	2073520	92543800	0.0224058	0.0202346	0.00189171	2.373			3.64961	4.26217	4.65309	6.3565		1	1.16784	1.27496	1.74169
		1808900	93454400	0.019356			0				4.96793	4.55522	5.30537		#DIV/0!	#DIV/0!	#DIV/0!	#DIV/0!
		1772190	93559000	0.018942			0				3.4142	2.13621	3.61429		#DIV/0!	#DIV/0!	#DIV/0!	#DIV/0!
	HIV 142	24873500	718592000	0.0346142	0.0290524	0.00554206	3.4071			5.1096	4.79198	5.02328	8.7878		1	0.937839	0.983106	1.71986
		16377100	696000000	0.0235303			0			3.52221	2.32735	2.53347	5.7473		1	0.660764	0.719283	1.63173
		19585100	675056000	0.0290126			0			4.52591	6.59525	5.04972	10.6383		1	1.45722	1.11573	2.35053
DLA012	HIV CTRL	23554200	1250100000	0.0188419	0.0181343	0.000966671	2.68515			1.93528	2.90026	2.98761	5.39709		1	1.49862	1.54376	2.78879
		24739200	1335220000	0.0185282						5.75554	8.11331	8.12872	15.6702		1	1.40965	1.41233	2.72262
		23784200	1396370000	0.0170329						4.14819	4.80749	3.80135	6.70967		1	1.15894	0.916386	1.61749
	HIV SFL	2440600	139820000	0.0174553	0.0203265	0.00404226	3.00975			3.76137	4.06387	4.36062	8.9006		1	1.08042	1.15932	2.36632
		3655770	146529000	0.0249491						3.69471	2.7682	3.13177	7.14036		1	0.749235	0.847638	1.93259
		2509520	135101000	0.0185751						2.08542	1.60815	2.38546	4.87129		1	0.77114	1.14387	2.33588
	HIV 142	22496400	536100000	0.0419631	0.0371689	0.00761471	5.50361
		16957200	597324000	0.0283886					Average %	3.818	3.95745	3.86637	7.00353
		22941400	557437000	0.0411551					SD	1.12753	1.94688	1.6494	3.15797
	HIV	48411300	1774400000	0.0272832	0.0257319	0.00134628	3.81012
		45304800	1809090000	0.0250429					Average Fold	1	1.05422	1.08239	2.05927
		45500300	1829560000	0.0248695					SD	0	0.312159	0.260674	0.470732
DLA014	HIV CTRL	6931470	390188000	0.0177644	0.0177593	0.000211822	4.26217
		6500470	361770000	0.0179685
		5955410	339437000	0.017545
	HIV SFL	1412310	68854400	0.0205115	0.0193882	0.00097397	4.65309
		1302120	68995900	0.0188724
		1268530	67545100	0.0187805
	HIV 142	5652710	214604000	0.0263402	0.0264858	0.00170671	6.3565
		5735270	202942000	0.0282606
		5179980	208395000	0.0248565
	HIV RT	8451540	605504000	0.0139579	0.0152069	0.00108293	3.64961
		8944050	566781000	0.0157804
		8992510	566190000	0.0158825
DLA016	HIV CTRL	2544620	131781000	0.0193095	0.020455	4.96793
		2575820	131739000	0.0195524
		2560210	113771000	0.0225032
	HIV SFL	2995020	161015000	0.0186009	0.0187557	4.55522
		3208700	162923000	0.0196946
		2766260	153923000	0.0179717
	HIV 142	2927530	134599000	0.02175	0.0218444	5.30537
		3023030	135184000	0.0223623
		2971920	138740000	0.0214208
DLA018	HIV CTRL	2815290	113193000	0.0248716	0.0268299	3.4142
		3016070	116748000	0.025834
		3451360	115879000	0.0297842
	HIV SFL	1892820	102494000	0.0184676	0.016787	2.13621
		1655810	103383000	0.0160163
		1492860	94025600	0.0158772
	HIV 142	2512900	92206300	0.027253	0.0284023	3.61429
		2530240	91813800	0.0275584
		2868180	94362400	0.0303954
DLA020	HIV CTRL	6892360	389532000	0.017694	0.0174306	4.79198
		7113990	423182000	0.0168107		0
		7078460	397952000	0.0177872		0
	HIV SFL	1485130	83298800	0.0178289	0.018272	5.02328
		1417220	76715500	0.0184737		0
		1500240	81036200	0.0185132		0
	HIV 142	1805510	59137400	0.0305308	0.0319652	8.7878
		1921120	57125300	0.0336299		0
		1866360	58810800	0.031735		0
	HIV only	31560700	1679840000	0.0187879	0.0185859	5.1096
		31947100	1688280000	0.0189229		0
		30630900	1697280000	0.0180471		0
DLA022	HIV CTRL	11023900	837747000	0.013159	0.0133946	2.32735
		10894400	829970000	0.0131263
		9350200	672740000	0.0138987
	HIV SFL	1650790	111618000	0.0147896	0.0145809	2.53347
		1560690	107642000	0.0144989
		1556860	107710000	0.0144542
	HIV 142	2983640	91701600	0.0325364	0.0330776	5.7473
		3103320	93890700	0.0330525
		2489540	73997000	0.0336438
	HIV Only	42641800	2063150000	0.0206683	0.0202714	3.52221
		36796600	1811210000	0.020316
		38965100	1964960000	0.01983
DLA026	HIV CTRL	4063620	200611000	0.0202562	0.0219068	0.0026003	6.59525
		4761970	191211000	0.0249043			0
		4042570	196623000	0.02056			0
	HIV SFL	472083	28224000	0.0167263	0.0167732	0.000435501	5.04972
		466964	28537800	0.016363			0
		434794	25234400	0.0172302			0
	HIV 142	1516790	41191000	0.0368233	0.0353363	0.00160447	10.6383
		1538370	43273800	0.0355497			0
		1435450	42676300	0.0336358			0
	HIV Only	16910800	1175360000	0.0143878	0.0150333	0.00079086	4.52591
		18291000	1149260000	0.0159155			0
		16951800	1145650000	0.0147967			0
DLA028	HIV CTRL	12763000	568863000	0.022436	0.0214788	0.000922123	2.90026
		12825700	599218000	0.0214041
		12263500	595423000	0.0205963
	HIV SFL	1815400	69274600	0.0262059	0.0221257	0.0053465	2.98761
		1659330	68857700	0.024098
		1110080	69064000	0.0160732
	HIV 142	3826590	106591000	0.0358997	0.0399699	0.00352484	5.39709
		4558960	108541000	0.0420022
		4348680	103521000	0.0420077
DLA030	HIV Only	16219600	1262240000	0.0128499	0.0143324	0.00129219	1.93528
		17945500	1202190000	0.0149273
		18201000	1195870000	0.0152199
	HIV	20498600	1114010000	0.0184007	0.0189565	5.75554
		19977600	1094190000	0.0182579
		22155700	1096220000	0.020211
	HIV CTRL	10535000	371228000	0.0283788	0.0267221	8.11331
		9784470	387373000	0.0252585
		9973280	375937000	0.0265291
	HIV SFL	1524500	57268000	0.0266205	0.0267729	8.12872
		1608030	60039400	0.0267829
		1586780	58954700	0.0269152
	HIV 142	2963440	56357600	0.0525828	0.0516115	15.6702
		3029370	56612100	0.053511
		2775460	56943500	0.0487406
DLA031	HIV	9777660	458498000	0.0213254	0.0219635	4.14819
		10565600	460850000	0.0229263
		10866000	502152000	0.0216389
	H CTRL	8960730	299317000	0.0299373	0.0254543	4.80749
		6604840	288435000	0.0228989
		6676000	283761000	0.0235268
	H SFL	850666	41258300	0.0206181	0.0201271	3.80135
		806002	41397800	0.0194697
		845513	41664200	0.0202935
	H1	1984890	62390500	0.031814	0.0355258	6.70967
		2304590	63310600	0.0364013
		2438400	63562600	0.0383622
DLA032	HIV	19519700	1433290000	0.0136188	0.0141576	3.76137
		19974500	1430340000	0.0139649	0.0148176
		21160700	1421220000	0.0148891	0.0149124
	HIV CTRL	10407000	667167000	0.0155988	0.0152962	4.06387
		9414470	660702000	0.0142492	0.0153812
		11161700	695840000	0.0160406	0.0164539
	HIV SFL	1360950	85844400	0.0158537	0.0164132	4.36062
		1511070	86508400	0.0174673	0.0213748
		1218180	76526100	0.0159185	0.0264223
	HIV 142	3480350	113224000	0.0307386	0.0335014	8.9006
		3652460	112005000	0.0326098	0.0349379
		4148110	111641000	0.0371558	0.0364445
DLA033	HIV	38715900	1965950000	0.0196932	0.0194328	3.69471
		38166100	1997370000	0.0191082	0.0181215
		39835700	2043160000	0.0194971	0.0168227
	HIV CTRL	23584500	1496540000	0.0157594	0.0145598	2.7682
		22540300	1481780000	0.0152116	0.0147405
		17947900	1412300000	0.0127083	0.014987
	HIV SFL	3113470	190991000	0.0163017	0.016472	3.13177
		3094070	193971000	0.0159512	0.0234788
		3215550	187352000	0.0171631	0.0311499
	HIV 142	8342160	223519000	0.0373219	0.0375557	7.14036
		8809700	226095000	0.0389646	0.0378279
		8218760	225910000	0.0363807	0.0385787
DLA034	HIV	28066900	1762660000	0.015923	0.0163116	2.08542
		27518000	1786440000	0.0154038	0.0154316
		30701000	1743590000	0.0176079	0.014508
	HIV CTRL	17416800	1311190000	0.0132832	0.0125785	1.60815
		16747100	1325690000	0.0126327	0.014279
		15200300	1286020000	0.0118196	0.0164526
	HIV SFL	2386220	129794000	0.0183847	0.0186584	2.38546
		2503120	130687000	0.0191536	0.0254328
		2379890	129082000	0.018437	0.0318282
	HIV 142	6059840	156553000	0.0387079	0.0381019	4.87129
		6015870	156910000	0.0383396	0.0366508
		5636120	151272000	0.0372582	0.0356812

## Sheet: HIV-BiFl
Expt	Sample	mCherry	GFP	GFP bleedover Cor	mCh corV	cor mCh	cor GFP	Ratio	%		%						Fold
BiFl002	HIV	119.918	15239.1	45.9186	73.9994	60.3881	14613	0.00413248	4.72944			HIV	CTRL	SFL	shSFL		HIV	CTRL	SFL	shSFL
	HIV Ctrl	109.706	13255.5	43.0587	66.6473	53.036	12629.4	0.0041994	4.80602			4.72944	4.80602	2.9336	9.46792		1	1.01619	0.620285	2.00191
	HIV SFL	58.8241	5710.33	32.1802	26.6439	13.0326	5084.27	0.00256332	2.9336			4.79513	5.25726	3.23134	8.88554		1	1.09637	0.67388	1.85303
	HIV 142	93.0384	6244.1	32.9498	60.0886	46.4773	5618.04	0.00827287	9.46792				3.90872	2.51193	6.35513		0	1	0.642646	1.62588
BiFl006	HIV	136.452	23077.8	57.2203	79.2322	65.9684	22413.2	0.00294329	4.79513
	HIV shCTRL	101.346	14196.7	44.4157	56.9308	43.6671	13532	0.00322694	5.25726		Average %	4.76228	4.65733	2.89229	8.23619
	HIV SFL	57.94	6436.81	33.2276	24.7123	11.4486	5772.13	0.00198342	3.23134		SD	0.0464531	0.686452	0.361483	1.65487
	HIV A	69.0359	5140.85	31.3591	37.6768	24.4131	4476.17	0.00545401	8.88554
BiFl008	HIV CTRL	72.9025	7974.93	35.4453	37.4572	20.4391	7305.85	0.00279763	3.90872		Average Fold	1	1.05628	0.647082	1.92747
	HIV SFL	62.4003	6987.75	34.0219	28.3784	11.3602	6318.66	0.00179789	2.51193		SD	0	0.0516062	0.0269196	0.189367
	HIV A	67.1285	4875.57	30.9766	36.1518	19.1337	4206.48	0.00454863	6.35513

## Sheet: SARS-DLA
	Sample	Firefly	Renilla	Ratio	Average	SD	%			%					Fold
DLA026	SARS CTRL	19116400	189961000	0.100633	0.0988258	0.0105331	29.7524			SARS	CTRL	SFL	shSFL		SARS	CTRL	SFL	shSFL
		20166400	186143000	0.108338			0			23.7616	29.7524	28.0833	54.8789		1	1.25212	1.18187	2.30956
		13833800	158090000	0.0875059			0			11.5666	17.5751	11.2223	26.0814		1	1.51948	0.970239	2.2549
	SARS SFL	3584080	40085200	0.0894116	0.0932815	0.00335379	28.0833			50.2314	49.2567	42.9052	88.7693		1	0.980594	0.85415	1.76721
		3783360	39682500	0.0953408			0			19.6936	23.0824	17.6866	37.8754		1	1.17208	0.89809	1.92323
		3630650	38180300	0.0950922			0			21.8448	21.8725	23.1406	49.7458		1	1.00127	1.05932	2.27723
	SARS 142	8683800	45938200	0.189032	0.182286	0.00999903	54.8789			18.6037	15.224	15.4432	34.7327		1	0.818333	0.830115	1.86698
		8023490	46976400	0.170798			0			12.5407	10.318	10.7297	23.1036		1	0.822764	0.855592	1.84229
		8489800	45393300	0.187028			0
	SARS	81187900	1010660000	0.0803316	0.0789268	0.0012251	23.7616		Average %	22.6061	23.8687	21.3159	45.0267
		79124400	1009640000	0.0783689			0		SD	12.992	12.7915	11.3786	22.47
		77916700	997909000	0.07808			0
DLA028	SARS CTRL	27335400	204628000	0.133586	0.130158	0.0046697	17.5751		Average Fold	1	1.08095	0.949911	2.03449
		22459400	179906000	0.12484					SD	0	0.252309	0.129931	0.235226
		25464400	192840000	0.132049
	SARS SFL	2316660	29912100	0.0774489	0.0831106	0.00506688	11.2223
		2667170	30580100	0.0872191
		2519030	29753400	0.0846636
	SARS 142	9899950	53113100	0.186394	0.193154	0.00993215	26.0814
		10073200	53435400	0.188512
		10124500	49494600	0.204558
	SARS Only	39538600	426201000	0.0927698	0.0856598	0.0065298	11.5666
		38193900	477834000	0.0799313
		37263100	442143000	0.0842784
DLA030	SARS	21679200	137658000	0.157486	0.165443	50.2314
		23770400	141203000	0.168342
		22575900	132409000	0.170501
	SARS CTRL	20424700	127353000	0.160379	0.162233	49.2567
		21138400	127747000	0.165471
		20700200	128694000	0.160848
	SARS SFL	4003500	28735800	0.139321	0.141313	42.9052
		4116480	28763200	0.143116
		4076320	28807400	0.141503
	SARS 142	9673780	33011800	0.29304	0.292372	88.7693
		10092700	34645700	0.291312
		9967840	34047300	0.292764
DLA031	SARS	62656300	553343000	0.113232	0.104272	19.6936
		61829300	564122000	0.109603
		52771300	586464000	0.0899822
	S CTRL	22591300	165717000	0.136325	0.122215	23.0824
		18467600	171712000	0.10755
		21083800	171733000	0.122771
	S SFL	2661210	27806300	0.0957053	0.0936459	17.6866
		2699140	27699000	0.0974454
		2481760	28270200	0.0877871
	S1	6665390	35929300	0.185514	0.20054	37.8754
		6823160	35246600	0.193583
		8134580	36556300	0.222522
DLA032	SARS	111350000	1269130000	0.0877373	0.0822228	21.8448
		103555000	1318150000	0.0785609	0.080851
		106477000	1324830000	0.0803703	0.0834212
	SARS CTRL	48906900	584858000	0.0836218	0.0823269	21.8725
		51074800	592025000	0.0862714	0.0845928
		36991400	479862000	0.0770876	0.085381
	SARS SFL	5853070	64732500	0.0904193	0.0871001	23.1406
		5979510	67461400	0.088636	0.123094
		5130390	62379400	0.0822449	0.151522
	SARS 142	21074300	106220000	0.198402	0.187241	49.7458
		18314200	105303000	0.173919	0.186173
		19098200	100835000	0.189401	0.201352
DLA033	SARS	182450000	1822920000	0.100087	0.0978489	18.6037
		174279000	1788690000	0.0974339	0.0900446
		175997000	1832800000	0.0960263	0.084393
	SARS CTRL	95255600	1242350000	0.0766737	0.080073	15.224
		98892700	1228800000	0.0804791	0.082818
		102821000	1237820000	0.0830662	0.0829552
	SARS SFL	10675300	125727000	0.0849086	0.0812259	15.4432
		10192500	126003000	0.0808909	0.111251
		9706500	124637000	0.0778782	0.144586
	SARS 142	29397700	168001000	0.174985	0.182682	34.7327
		31347000	173288000	0.180895	0.190747
		25302700	131672000	0.192165	0.200339
DLA034	SARS	174806000	1559700000	0.112077	0.0980901	12.5407
		143458000	1593770000	0.0900117	0.0885044
		142375000	1544500000	0.0921819	0.0851189
	SARS CTRL	79566200	954954000	0.0833194	0.080705	10.318
		74979900	938947000	0.0798553	0.0819372
		74867200	948402000	0.0789404	0.0823566
	SARS SFL	8569720	98484400	0.087016	0.0839251	10.7297
		8099110	99849300	0.0811133	0.116434
		8414290	100594000	0.083646	0.14618
	SARS 142	23784400	128882000	0.184544	0.180711	23.1036
		21810800	128035000	0.17035	0.18998
		23017300	122931000	0.187238	0.213753

## Sheet: SARS-BiFl
Expt	Sample	mCherry	GFP	GFP bleedover Cor	mCh corV	cor mCh	cor GFP	Ratio	%		%						Fold
BiFl007	SARS	808.412	30174.5	67.4521	740.96	725.57	29493.1	0.0246014	37.7392			SARS	CTRL	SFL	shSFL		SARS	CTRL	SFL	shSFL
	SARS CTRL	549.268	21014.3	54.2452	495.023	479.633	20332.9	0.0235889	36.1861			37.7392	36.1861	21.1878	57.6173		1	0.958847	0.561428	1.52672
	SARS SFL	256.15	14830.8	45.3299	210.82	195.43	14149.4	0.0138119	21.1878			39.5854	29.2643	16.8527	50.5654		1	0.73927	0.425729	1.27738
	SARS A	536.019	13391.2	43.2544	492.765	477.375	12709.8	0.0375595	57.6173				34.9105	18.6063	45.4922		#DIV/0!	1	0.532972	1.30311
BiFl008	SARS CTRL	414.144	17295.1	48.8829	365.261	348.243	16626	0.0209457	29.2643
	SARS SFL	165.628	9829.24	38.1187	127.509	110.491	9160.15	0.0120622	16.8527		Average %	38.6623	33.4536	18.8823	51.225
	SARS A	444.767	11373.3	40.3449	404.423	387.404	10704.2	0.0361918	50.5654		SD	1.30548	3.68371	2.18072	6.0894
BiFl009	SARS	533.792	15606	46.4476	487.344	472.213	15035.4	0.0314067	39.5854
	SARS CTRL	434.962	14128.2	44.3169	390.646	375.515	13557.6	0.0276977	34.9105		Average Fold	1	0.899372	0.50671	1.36907
	SARS SFL	146.623	7156.8	34.2657	112.357	97.2264	6586.22	0.0147621	18.6063		SD	0	0.140171	0.07156	0.137137
	SARS A	386.11	9794.22	38.0683	348.041	332.91	9223.65	0.0360931	45.4922

## Sheet: SARS2-BiFL
Expt	Sample	mCherry	GFP	GFP bleedover Cor	mCh corV	cor mCh	cor GFP	Ratio	%		%						Fold
BiFl010	SARS2	420.479	17684.7	49.4446	371.034	359.388	17113.7	0.021	25.7653			SARS2	CTRL	SFL	shSFL		SARS2	CTRL	SFL	shSFL
	S2 Ctrl	420.233	17464.3	49.1268	371.106	359.459	16893.3	0.0212782	26.1067			25.7653	26.1067	16.1473	59.6016		1	1.01325	0.626707	2.31325
	S2 SFL	121.053	6366.94	33.1269	87.9261	76.2793	5795.91	0.0131609	16.1473			29.3133	24.0513	16.821	55.7164		1	0.820491	0.573836	1.90072
	S2 shA	341.224	6664.71	33.5562	307.668	296.021	6093.69	0.0485783	59.6016			27.6321	28.5942	23.0817	35.2303		1	1.03482	0.835323	1.27498
BiFl023	SARS2	504.273	18738.8	50.9644	453.309	440.592	18148.2	0.0242774	29.3133			29.5742	24.9302	11.7153	52.8049		1	0.842971	0.396133	1.78551
	S2 CTRL	306.434	13179.7	42.9494	263.485	250.768	12589.1	0.0199194	24.0513
	S2 SFL	149.925	7902.7	35.3411	114.584	101.867	7312.13	0.0139313	16.821		Average %	28.0712	25.9206	16.9413	50.8383
	S2 A	433.214	8905.95	36.7876	396.426	383.71	8315.38	0.0461446	55.7164		SD	1.7618	1.9713	4.67834	10.7714
BiFl024	SARS2	134.869	5145.41	31.3657	103.503	90.8173	4603.95	0.019726	27.6321
	S2 CTRL	87.1603	2817.71	28.0097	59.1506	46.4647	2276.25	0.0204128	28.5942		Average Fold	1	0.927883	0.608	1.81861
	S2 SFL	68.4128	2271.38	27.222	41.1908	28.5048	1729.92	0.0164776	23.0817		SD	0	0.111753	0.180814	0.427412
	S2 A	74.9018	1951.21	26.7604	48.1414	35.4555	1409.75	0.0251502	35.2303
BiFl025	SARS2	540.321	18684.5	48.358	491.963	477.743	18057.9	0.0264562	29.5742
	S2 CTRL	524.467	21224.1	50.886	473.581	459.361	20597.5	0.0223018	24.9302
	S2 SFL	154.438	8801.13	54.548	99.89	85.6703	8174.51	0.0104802	11.7153
	S2 shA	508.206	10308.5	36.636	471.57	457.35	9681.88	0.0472377	52.8049
**BiFl024-->none of the SFL conditions changed, maybe forgot the SFL plasmid in this one???

## Sheet: VEEV FS DLA
Experiment	Sample	Firefly	Renilla	Ratio	SD	%				%						Fold
DLA026	VEEV CTRL	413120	88188100	0.00468453	0.00392749	0.000659172	1.18241	1.41032			VEEV	CTRL	SFL	shSFL		VEEV	CTRL	SFL	shSFL
		330261	91299800	0.00361732			0	1.08903			0.784438	1.18241	0.850458	1.67457		1	1.50733	1.08416	2.13474
		317663	91266400	0.00348061			0	1.04787			2.16193	2.30106	1.64495	3.78519		1	1.06435	0.76087	1.75084
	VEEV SFL	71610.3	25741600	0.00278189	0.00282489	4.88958e-05	0.850458	0.837513			6.00187	6.92468	5.24176	11.8488		1	1.15375	0.873354	1.97418
		77463.4	26915000	0.00287808			0	0.866471			4.73689	4.11937	3.18533	4.84953		1	0.869636	0.672452	1.02378
		72652.1	25811700	0.0028147			0	0.84739			2.72912	3.54499	2.96127	7.72993		1	1.29895	1.08506	2.83239
	VEEV 142	120005	21906100	0.00547815	0.00556228	0.000285565	1.67457	1.64925			2.38788	2.07319	2.93468	6.25329		1	0.868216	1.22899	2.61876
		120063	22533400	0.00532822			0	1.60411			1.59641	1.41133	1.73544	4.50091		1	0.884062	1.08709	2.81939
		134122	22808100	0.00588045			0	1.77036
	VEEV	225933	90065600	0.00250854	0.0026056	0.000258002	0.784438	0.755218		Average %	2.91408	3.07958	2.65055	5.80603
		259748	89628500	0.00289805			0	0.872485		SD	1.82599	2.00349	1.42984	3.27076
		222558	92340100	0.0024102			0	0.725612
DLA028	VEEV CTRL	2108910	101940000	0.0206878	0.0170412	0.00323347	2.30106			Average Fold	1	1.09233	0.970282	2.16487
		1490290	102613000	0.0145234						SD	0	0.245854	0.203579	0.657111
		1600540	100584000	0.0159125
	VEEV SFL	185385	15635400	0.0118567	0.0121822	0.00181594	1.64495
		240637	17019600	0.0141388
		177376	16811400	0.0105509
	VEEV 142	928587	33741900	0.0275203	0.0280324	0.000670089	3.78519
		917489	33019600	0.0277862
		935652	32498300	0.0287908
		1437750	32113800	0.0447705
	VEEV only	1950170	127571000	0.0152869	0.0160108	0.0022942	2.16193
		2428810	130724000	0.0185797
		1649070	116411000	0.0141659
DLA030	VEEV	580059	28354200	0.0204576	0.0197679	6.00187
		542991	27483400	0.0197571
		513639	26907700	0.0190889
	VEEV CTRL	979542	46095300	0.0212504	0.0228072	6.92468
		1089400	44972600	0.0242236
		1051680	45829400	0.0229477
	VEEV SFL	158636	8182940	0.0193862	0.0172643	5.24176
		142199	8330700	0.0170693
		131143	8550450	0.0153376
	VEEV 142	494595	12823900	0.0385682	0.0390253	11.8488
		518830	13091300	0.0396317
		511095	13146800	0.038876
DLA031	VEEV	6916880	285063000	0.0242644	0.0250805	4.73689
		7718120	292240000	0.0264102
		5365460	218401000	0.024567
	V CTRL	3585790	200043000	0.0179251	0.0218109	4.11937
		3780520	205401000	0.0184056
		5687170	195421000	0.0291021
	V SFL	632452	32186900	0.0196494	0.0168655	3.18533
		424470	33263300	0.0127609
		593824	32652600	0.0181861
	V1	1119350	44194300	0.0253279	0.0256769	4.84953
		1223070	44712800	0.0273539
		1090010	44766100	0.024349
DLA032	VEEV	12641900	1226600000	0.0103065	0.0102723	2.72912
		12486900	1225280000	0.0101911	0.0112212
		12632200	1224130000	0.0103193	0.012239
	VEEV CTRL	6805410	517395000	0.0131532	0.0133432	3.54499
		7388920	557885000	0.0132445	0.0126817
		8019210	588274000	0.0136318	0.0118761
	VEEV SFL	875823	78416800	0.0111688	0.0111461	2.96127
		869079	80264300	0.0108277	0.0178687
		911086	79629000	0.0114416	0.0234204
	VEEV 142	3793030	121041000	0.0313367	0.0290951	7.72993
		3253640	118388000	0.0274829	0.0273796
		3436910	120739000	0.0284656	0.0265506
DLA033	VEEV	19094900	1543650000	0.01237	0.0125594	2.38788
		18778500	1557180000	0.0120593	0.0118798
		20281000	1530770000	0.0132489	0.0115646
	VEEV CTRL	12700500	1229320000	0.0103313	0.0109043	2.07319
		13570800	1221100000	0.0111136	0.012213
		13495200	1197670000	0.0112679	0.0136506
	VEEV SFL	2140470	150129000	0.0142575	0.0154354	2.93468
		2388280	154817000	0.0154265	0.0237942
		2520400	151630000	0.016622	0.028838
	VEEV 142	7571520	192493000	0.039334	0.0328901	6.25329
		6097350	199534000	0.030558	0.0289944
		5431260	188728000	0.0287782	0.028367
DLA034	VEEV	21708100	1654940000	0.0131172	0.0124867	1.59641
		21033900	1657530000	0.0126899	0.0117187
		19298700	1656100000	0.0116531	0.011079
	VEEV CTRL	10672500	987006000	0.010813	0.011039	1.41133
		10607700	984847000	0.0107709	0.012379
		11726700	1016780000	0.0115332	0.0129693
	VEEV SFL	1513270	102022000	0.0148328	0.0135741	1.73544
		1274090	101587000	0.0125419	0.0216137
		1167500	87468000	0.0133477	0.02872
	VEEV 142	4786350	122880000	0.0389514	0.0352049	4.50091
		4237590	125147000	0.0338609	0.0326554
		4130840	125931000	0.0328024	0.0323372

## Sheet: VEEV-BiFl
Expt	Sample	mCherry	GFP	GFP bleedover Cor	mCh corV	cor mCh	cor GFP	Ratio	%
BiFl007	VEEV	104.617	16118	47.1858	57.4307	42.0405	15436.6	0.00272342	4.17781
	VEEV CTRL	86.3607	11560.4	40.6147	45.746	30.3558	10879	0.00279031	4.28042
	VEEV SFL	57.4303	6019.73	32.6263	24.804	9.41378	5338.31	0.00176344	2.70516
	VEEV A	69.1783	4848.03	30.937	38.2413	22.8511	4166.62	0.00548433	8.41312
BiFl009	VEEV	45.7754	2086.93	26.956	18.8194	3.68846	1516.35	0.00243245	3.0659
	VEEV CTRL	45.3625	1957.55	26.7695	18.593	3.46209	1386.97	0.00249615	3.14618
	VEEV SFL	42.3349	2177.55	27.0867	15.2482	0.117252	1606.97	7.29644e-05	0.0919652
	VEEV A	44.8346	1694.33	26.39	18.4445	3.3136	1123.75	0.00294869	3.71657

## Sheet: VEEV TCR
Expt	Sample	mCherry	GFP	GFP bleedover Cor	mCh corV	cor mCh	cor GFP	Ratio	%		%						Fold
BiFl023	VEEV	90.4798	22199.9	55.9545	34.5253	21.8085	21609.3	0.00100922	1.21856			VEEV TCR	shCTRL	SFL	shSFL		VEEV TCR	shCTRL	SFL	shSFL
	VEEV CTRL	85.2112	21355.2	54.7366	30.4746	17.7578	20764.6	0.000855194	1.03259			1.21856	1.03259	0.54436	1.89471		1	0.847383	0.446724	1.55488
	VEEV SFL	59.6048	12261.9	41.6261	17.9787	5.26192	11671.3	0.000450842	0.54436			1.69894	1.81384	2.26136	2.2069		1	1.06763	1.33104	1.29899
	VEEV A	66.1027	10084.9	38.4874	27.6153	14.8986	9494.33	0.00156921	1.89471			1.09458	0.910383	0.453716	1.77562		1	0.831718	0.414511	1.62219
BiFl024	VEEV	50.7903	5580.42	31.9929	18.7974	6.11143	5038.96	0.00121284	1.69894
	VEEV CTRL	44.0003	2948.24	28.1979	15.8024	3.11646	2406.78	0.00129487	1.81384		Average %	1.33736	1.25227	1.08648	1.95908
	VEEV SFL	41.4031	1846.81	26.6098	14.7933	2.10727	1305.35	0.00161434	2.26136		SD	0.319212	0.490159	1.01849	0.222726
	VEEV A	43.4703	2548.76	27.6219	15.8484	3.16242	2007.3	0.00157546	2.2069
BiFl025	VEEV	98.513	25180.1	60.251	38.262	24.0423	24553.5	0.000979181	1.09458		Average Fold	1	0.915579	0.73076	1.49202
	VEEV CTRL	79.9434	18742.6	50.97	28.9734	14.7537	18116	0.000814402	0.910383		SD	0	0.131917	0.520111	0.170526
	V SFL	57.2746	10479	39.056	18.2186	3.9989	9852.38	0.000405882	0.453716
	V shA	68.3186	10278.9	38.767	29.5516	15.3319	9652.28	0.00158842	1.77562
**BiFl024-->none of the SFL conditions changed, maybe forgot the SFL plasmid in this one???

[truncated: 1 more sheets: OAZ1+1]
