# Supplementary material for: Shiftless Is a Novel Member of the Ribosome Stress Surveillance Machinery That Has Evolved to Play a Role in Innate Immunity and Cancer Surveillance
Source: Viruses. 2023 Nov 23;15(12):2296. doi: 10.3390/v15122296 (PMC10747187; doi:10.3390/v15122296)
Supplement: Supplementary file 1 [file viruses-15-02296-s001.zip › Supplemental Data Set S2_ Shiftless figures data.xlsx]

## Sheet: Figure 1
	SARS Bifluor					HIV Bifluor					CCR5 Bifluor					OE-overexpression
	SARS	shCTRL	SFL OE	shSFL		HIV	shCTRL	SFL OE	shSFL		CCR5	shCTRL	SFL OE	shSFL
	37.7392	36.1861	21.1879	57.6173		4.758	4.80602	2.9336	9.46792		1.60606	2.04083	1.14474	3.08345
	39.5854	29.2643	16.8527	50.5654		4.79	5.25726	3.23134	8.88554		1.83527	1.96212	0.976062	3.39684
	29.3133	34.9105	18.6063	45.4922		3.98668	3.90872	2.51193	6.35513		1.84318	1.60712	0.731582	2.39425
Average	35.546	33.4536	18.8823	51.225	Average	4.51156	4.65733	2.89229	8.23619	Average	1.76151	1.87003	0.950794	2.95818
Fold	1	0.941137	0.531208	1.44109		1	1.03231	0.641084	1.82558		1	1.06161	0.539762	1.67935
SD	5.47603	3.6837	2.18072	6.08939	SD	0.454839	0.686453	0.361483	1.65487	SD	0.134676	0.231056	0.207734	0.512901
p-value		0.8998	0.0057	0.0081	p-value		0.9949	0.1569	0.003	p-value		0.9471	0.0298	0.0036
Signif		ns	**	**	Signif		ns	ns	**	Signif		ns	*	**
	SARS Dluc					HIV Dluc					CCR5 Dluc
	SARS	CTRL	SFL OE	shSFL		HIV	shCTRL	SFL OE	shSFL		CCR5	shCTRL	SFL OE	shSFL
	19.6936	23.0824	17.6867	37.8754		3.64961	4.26217	4.65309	6.35649		1.4445	1.71312	1.22763	3.40778
	21.8448	21.8725	23.1406	49.7458		5.1096	4.79198	5.02328	8.7878		1.7654	1.20474	0.873789	2.39928
	18.6037	15.224	15.4432	34.7327		4.14819	4.80749	3.80135	6.70967		2.22268	2.3822	1.99178	5.10362
	23.7616	29.7524	28.0832	54.8789		3.76137	4.06387	4.36062	8.9006		1.68688	1.63668	0.938895	2.81098
Average	20.976	22.4828	21.0884	44.3082	Average	4.16719	4.48138	4.45958	7.68864	Average	1.77986	1.73418	1.25802	3.43041
Fold	1	1.07184	1.00536	2.11233	Fold	1	1.0754	1.07017	1.84504	Fold	1	0.974335	0.706808	1.92735
SD	2.29396	5.95172	5.6739	9.56342	SD	0.663597	0.37647	0.515837	1.34288	SD	0.325277	0.486547	0.512768	1.18983
p-value		0.9747	>0.999	0.0007	p-value		0.9043	0.9203	0.0002	p-value		0.9994	0.613	0.017
Signif		ns	ns	***	Signif		ns	ns	***	Signif		ns	ns	*

## Sheet: Figure 2
Bifluor	OAZ1	shCTRL	SFL OE	shSFL		VEEV TCR	shCTRL	SFL OE	shSFL
	20.9961	19.3606	12.5959	35.4947		1.21856	1.03259	0.54436	1.89471
	19.7813	17.8147	10.397	36.3165		1.09455	0.910368	0.453721	1.77557
	24.0077	20.4739	13.5175	38.2608		1.60572	1.32458	0.517797	2.20647
	19.3045	17.9437	10.6859	33.3234		1.07358	0.98398	0.576794	1.71075
	20.3018	19.9932	12.6012	36.2478
Average	20.8783	19.1172	11.9595	35.9286	Average	1.2481	1.06288	0.523168	1.89687
Fold	1	0.915651	0.572822	1.72086	Fold	1	0.851596	0.419171	1.51981
SD	1.85874	1.19802	1.35166	1.77952	SD	0.246845	0.181556	0.0522066	0.220009
p-value		0.2206	<0.0001	<0.0001	p-value		0.4092	0.0005	0.0011
signif		ns	****	****	signif		ns	***	**
Dual luc	0-frame -FSE					-1 frame -FSE
	Reporter only	shCTRL	SFL OE	shSFL		Reporter only	shRNA CTRL	SFL overexpr.	shSFL			0-frame BiFl
	1	1.04002	0.892248	1.70723		0.673159	0.486431	0.369088	1.0103			Reporter only	shCTRL	SFL OE	shSFL
	1	1.00726	0.835889	1.44316		0.905558	0.707974	0.462664	2.38143			1	0.994703	0.814494	1.92108
	1	1.16527	0.91335	1.56722		0.573769	0.738217	0.631925	1.50826			1	1.14024	0.857535	2.30898
	1	1.14664	0.979	1.89363		0.501548	0.540904	0.66134	1.77858			1	0.967878	0.675433	1.94093
Average	1	1.0898	0.905122	1.65281	Average	0.663508	0.618381	0.531254	1.66964		Average	1	1.03427	0.782487	2.057
Fold	1	1.0898	0.905122	1.65281	Fold	1	0.931987	0.800674	2.51638		Fold
SD	0	0.0779265	0.0591176	0.193423	SD	0.176035	0.12356	0.139116	0.571339		SD	0	0.0927457	0.0951764	0.218452
p-value		0.5281	0.4877	<0.0001	p-value		0.9938	0.8802	0.0018		p-value		0.9752	0.1621	<0.0001
signif		ns	ns	****	signif		ns	ns	**		signif		ns	ns	****

## Sheet: Figure 3
0-frame activity
Renilla	0-frame	SFL OE	shSFL		Firefly	Reporter only	SFL overexpr.	shSFL
	1090000000	133000000	234000000	184000000		444000000	25500000	264000000	131000000
	159000000	61100000	76300000	103000000		1140000000	37700000	599000000	83000000
	382000000	101000000	76100000	156000000		153000000	56200000	372000000	131000000
	174000000	76200000	171000000			450000000	32900000	40200000
	1180000000	52200000	254000000			1080000000	22100000	46100000
	1680000000	97700000	547000000			965000000	30900000	106000000
	439000000	128000000	500000000			275000000	36300000	70000000
	1240000000	69100000	67300000			230000000	35600000	486000000
	1880000000	66100000	81000000			756000000	88900000	284000000
	1300000000	102000000	98100000			102000000	34400000	62900000
	837000000	65100000	70100000			233000000	60000000	87700000
	434000000	69800000	495000000			137000000	53500000	230000000
	1640000000		703000000			860000000		491000000
	1590000000		91900000			1250000000		51300000									Average			Renilla	Dluc	shCTRL	SFL	shSFL		Firefly	Dluc	shCTRL	SFL	shSFL
	770000000		83300000			392000000		52000000									Fold			HIV WT	962990000	8.63556e+08	1.63985e+08	2.13816e+08		HIV WT	19109200	18847100	5.3991e+06	1.35349e+07
	1270000000		101000000			814000000		125000000									Recip fold			HIV WT	1.3985e+08	1.76486e+08	67485000	88779400		HIV WT	4.2007e+06	5668660	1827210	3615660
			121000000					102000000			1004062500	580062500					SD			HIV WT	519405000	3.27246e+08	9.87313e+07	9.95871e+07		HIV WT	11674200	1.0354e+07	3.30436e+06	5.73064e+06
Average	1004062500	8.51083e+07	228068750	1.47667e+08	Average	580062500	4.28333e+07	210450000	115000000								p-value			HIV WT	1.84144e+08	3.07002e+08	68786500	7.89677e+07		HIV WT	6.83055e+06	1.05659e+07	2199900	4.99068e+06
Fold	1	0.084764	0.227146	0.147069	Fold	1	0.0738426	0.362806	0.198254								signif			Average	451597250	4.18572e+08	99746875	1.20287e+08		Average	1.04537e+07	1.13589e+07	3.18264e+06	6.96796e+06
Recip fold		11.7975	4.40246	6.79952			13.5423	2.7563	5.04402											Fold	1	0.926871	0.220876	0.26636		Fold	1	1.0866	0.304452	0.666557
SD	5.62214e+08	2.66641e+07	2.10956e+08	4.1138e+07	SD	3.9485e+08	1.87644e+07	1.86471e+08												Recip fold	1	1.0789	4.52743	3.75432			1	0.920305	3.28459	1.50025
p-value		<0.0001	<0.0001		p-value		<0.0001	0.0003																	0.399606
signif		****	****		signif		****	***												Renilla	Dluc	shCTRL	SFL	shSFL		Firefly	Dluc	shCTRL	SFL	shSFL
-1 frame activity																										SARS2 WT	92837700	5.62649e+07	1.06471e+07	34197700
Renilla	-1 frame	SFL overexpr.	shSFL		Firefly	-1 frame	SFL OE	shSFL												SARS2 WT	4.40978e+08	1.94194e+08	4.77563e+07	69974200
	118000000	31100000	27100000			373000	108000	225000												SARS2 WT	179954000	1.64087e+08	4.41429e+07	57042300		SARS2 WT	3.00788e+07	2.9853e+07	6.99822e+06	1.34717e+07
	197000000	47300000	46900000			689000	148000	437000												SARS2 WT	1.47932e+08	230390000	4.89938e+07	5.29579e+07		SARS2 WT	30282100	46412000	8.72983e+06	1.55706e+07
	135000000	18700000	14600000			619000	43800	176000												Average	2.56288e+08	1.96224e+08	4.69643e+07	5.99915e+07		Average	5.10662e+07	4.41767e+07	8.79171e+06	2.108e+07
	318000000	62200000	47300000			1160000	301000	615000												Fold	1.14249	0.874734	0.20936	0.267432		Fold	1.18579	1.02581	0.204149	0.48949
Average	192000000	39825000	33975000	9.02578e+07	Average	710250	150200	363250													1	1.3061	5.45707	4.27207			1	1.15595	5.80845	2.4225
Fold	1	0.207422	0.176953		Fold	1	0.211475	0.51144
Recip fold		4.82109	5.65121				4.7287	1.95526																	0.567055
SD	9.06017e+07	1.89641e+07	1.59924e+07	7.66741e+07	SD	329034	109312	202479
p-value		0.006	0.0048		p-value		0.014	0.1101
signif		**	**		signif		*	ns
GFP only	GFP	SFL OE	-/- SFL		0-frame BiFl
	226519	65728.7	187685		GFP	0-frame	SFL OE	shSFL		mCherry	0-frame	SFL OE	shSFL
	176068	83623	174219			10744.8	7281.55	9044.18			831.511	406.042	1070.59
	264949	98663.5	154606			17072.4	8463.62	8775.04			1283.74	489.091	1308.54
	229875	62227.6	131640			14436.9	7107.15	8206.11			1020.66	418.883	1317.12
Average	224353	77560.7	162037		Average	14084.7	7617.44	8675.11		Average	1045.3	438.005	1232.08
Fold	1	0.345709	0.722244		Fold	1	0.540831	0.615924		Fold	1	0.419022	1.17868
Recip fold	1	2.89261	1.38457		Recip fold	1	1.84901	1.62358		Recip fold	1	2.38651	0.848403
SD	36581.5	16903.5	24395.3		SD					SD
p-value		<0.0001	0.0184		p-value		0.0105	0.023		p-value		0.0056	0.3118
signif		****	*		signif		*	*		signif		**	ns

## Sheet: Figure 4
HIV reporter								0-frame reporter
A. ZNF598	HIV	SFL	shSFL	shZNF	shZNF+SFL	shZNF+shSFL		shZNF	0-fr	SFL	shSFL	shZNF	shZNF+SFL	shZNF+shSFL
	4.2843	2.23735	10.9159	8.11214	1.67217	9.99217			1	0.88137	0.936741	1.37174	0.99177	1.21754
	3.98668	2.23731	8.28421	7.18353	2.74451	7.4795			1	0.984932	1.25042	1.52672	1.18423	1.59566
	4.32992	2.42642	7.79413	6.85652	2.31459	8.31978			1	0.997403	1.20276	1.81734	1.40641	1.43933
Average	4.2003	2.30036	8.99807	7.38406	2.24376	8.59715		Average	1	0.954568	1.12998	1.57193	1.19414	1.41751
Fold	1.05845	0.579676	2.26746	1.86074	0.565413	2.16643		SD	0	0.0636977	0.169034	0.226211	0.207499	0.190002
SD	0.186399	0.109169	1.67884	0.651389	0.539667	1.27909		p-value		0.9963	0.7952	0.0046	0.4924	0.0351
p-value		0.1008	0.0002	0.0052	0.0888	0.0004		signif		ns	ns	**	ns	*
signif		ns	***	**	ns	***
B. ASCC3	HIV	SFL	shSFL	shASCC3	shASCC3+SFL	shASCC3+shSFL		ASCC3	0-fr	SFL	shSFL	shASCC3	shASCC3+SFL	shASCC3+shSFL
	4.2843	2.23735	10.9159	6.79121	1.76338	9.38282			1	0.88137	0.936741	1.27389	1.01698	1.16327
	3.98668	2.23731	8.28421	6.64102	2.31731	7.10392			1	0.984932	1.25042	1.60807	1.23424	1.64174
	4.32992	2.42642	7.79413	6.43951	2.08758	7.1036			1	0.997403	1.20276	1.727	1.28174	1.43644
Average	4.2003	2.30036	8.99807	6.62391	2.05609	7.86345		Average	1	0.954568	1.12998	1.53632	1.17765	1.41382
Fold	1.05845	0.579676	2.26746	1.66918	0.518122	1.98154		SD	0	0.0636977	0.169034	0.234921	0.141157	0.240037
SD	0.186399	0.109169	1.67884	0.176471	0.278307	1.31582		p-value		0.9964	0.7994	0.0077	0.5748	0.0383
p-value		0.0574	<0.0001	0.0131	0.0291	0.0004		signif		ns	ns	**	ns	*
signif		ns	****	*	*	***
C. Hbs1L	HIV	SFL	shSFL	shHbs	shHbs+SFL	shHbs+shSFL		Hbs1L	0-fr	SFL	shSFL	shHbs	shHbs+SFL	shHbs+shSFL
	4.2843	2.23735	10.9159	7.91457	1.88301	9.65881			1	0.88137	0.936741	1.32626	1.05649	1.44599
	3.98668	2.23731	8.28421	7.36978	2.1531	7.35939			1	0.984932	1.25042	1.56642	1.30046	1.53591
	4.32992	2.42642	7.79413	7.34053	2.37613	7.00852			1	0.997403	1.20276	1.80517	1.31748	1.14634
Average	4.2003	2.30036	8.99807	7.54162	2.13741	8.00891		Average	1	0.954568	1.12998	1.56595	1.22481	1.37608
Fold	1.05845	0.579676	2.26746	1.90044	0.538614	2.01819		SD	0	0.0636977	0.169034	0.239453	0.146018	0.203974
SD	0.186399	0.109169	1.67884	0.323308	0.246935	1.43959		p-value		0.9959	0.7764	0.004	0.3391	0.0514
p-value		0.0705	<0.0001	0.0014	0.0459	0.0004		signif		ns	ns	**	ns	ns
signif		ns	****	**	*	***
D. Pelota	HIV	SFL OE	shSFL	shPelo	shPelo+SFL OE	shPelo+shSFL		Pelota	0-fr	SFL OE	shSFL	shPelo	shPelo+SFL OE	shPelo+shSFL
	3.76348	2.31476	9.24719	7.7408	1.96391	7.78243			1	1.2	1.6548	1.3674	0.9883	1.6348
	4.06289	2.16595	7.88727	8.31954	1.72906	7.64534			1	1.098	1.787	1.8638	1.154	2.0662
	4.0787	2.52788	7.49701	7.1289	2.60023	7.13891			1	0.8359	1.443	1.3346	0.92869	1.4126
Average	3.96835	2.33619	8.21049	7.72975	2.09773	7.52222			1	0.9133	1.5672	1.553	0.9759	1.6789
Fold	1	0.588706	2.06899	1.94785	0.528615	1.89555		Average	1	1.0118	1.613	1.5297	1.01172	1.69813
SD	0.177607	0.181915	0.918769	0.595396	0.450741	0.338965		SD	0	0.166826	0.144938	0.242605	0.0982669	0.271651
p-value		0.0086	<0.0001	<0.0001	0.0032	<0.0001		p-value		0.9999	0.0006	0.0024	0.9999	0.0001
signif		**	****	****	**	****		signif		ns	***	**	ns	***
E. SMG1	HIV	SFL	shSFL	shSMG1	shSMG1+SFL	shSMG1+shSFL		SMG1	0-fr	SFL OE	shSFL	shSMG1	shSMG1+SFL OE	shSMG1+shSFL
	3.76348	2.31476	9.24719	7.6147	1.97827	7.35914			1	1.098	1.7871	1.8511	1.22	2.085
	4.06289	2.16595	7.88727	8.41126	1.97507	6.86836			1	0.8359	1.44316	1.4223	0.95633	1.381
	4.0787	2.52788	7.49701	6.47679	2.41356	7.29773			1	0.9133	1.5672	1.5004	0.99118	1.5394
Average	3.96835	2.33619	8.21049	7.50092	2.1223	7.17507		Average	1	0.949067	1.59915	1.59127	1.05584	1.66847
Fold	1	0.588706	2.06899	1.89018	0.534806	1.80807		SD	0	0.134661	0.174182	0.228385	0.143233	0.369321
SD	0.177607	0.181915	0.918769	0.972244	0.252242	0.267395		p-value		0.9996	0.017	0.0186	0.9983	0.0079
p-value		0.0182	<0.0001	<0.0001	0.0082	<0.0001		signif		ns	*	*	ns	**
signif		*	****	****	**	****

## Sheet: Figure 4 Raw data
HIV reporter								0-frame reporter Rluc
A. ZNF598	HIV	SFL	shSFL	shZNF	shZNF+SFL	shZNF+shSFL		ZNF598	0-fr	SFL	shSFL	shZNF	shZNF+SFL	shZNF+shSFL	Fluc	0-fr	SFL	shSFL	shZNF	shZNF+SFL	shZNF+shSFL
	4.2843	2.23735	10.9159	8.11214	1.67217	9.99217			292000000	167000000	106000000	124000000	185000000	72701000		180000000	101000000	76576033	117000000	132000000	62958733
	3.98668	2.23731	8.28421	7.18353	2.74451	7.4795			340000000	92657000	92014267	135000000	139000000	82127000		206000000	56870267	71970767	149000000	118000000	81127967
	4.32992	2.42642	7.79413	6.85652	2.31459	8.31978			144000000	80282833	60257800	93963700	87287400	56522600		114000000	56154000	45424767	104000000	70902067	54558333
Average	4.2003	2.30036	8.99807	7.38406	2.24376	8.59715		Average	2.58667e+08	1.13313e+08	86090689	1.17655e+08	137095800	70450200	Average	1.66667e+08	7.13414e+07	64657189	1.23333e+08	1.06967e+08	66215011
Fold	1.05845	0.579676	2.26746	1.86074	0.565413	2.16643		SD	1.02163e+08	4.69039e+07	2.34394e+07	2.12413e+07	4.88841e+07	1.29497e+07	SD	4.74271e+07	2.56876e+07	1.68142e+07	2.31589e+07	3.20083e+07	1.35808e+07
SD	0.186399	0.109169	1.67884	0.651389	0.539667	1.27909		p-value							p-value
p-value		0.1008	0.0002	0.0052	0.0888	0.0004		signif							signif
signif		ns	***	**	ns	***
B. ASCC3	HIV	SFL	shSFL	shASCC3	shASCC3+SFL	shASCC3+shSFL		ASCC3	0-fr	SFL	shSFL	shASCC3	shASCC3+SFL	shASCC3+shSFL	ASCC3	0-fr	SFL	shSFL	shASCC3	shASCC3+SFL	shASCC3+shSFL
	4.2843	2.23735	10.9159	6.79121	1.76338	9.38282			292000000	167000000	106000000	126000000	125000000	56999367	180000000	101000000	76576033	121000000	94361967	48903967
	3.98668	2.23731	8.28421	6.64102	2.31731	7.10392			340000000	92657000	92014267	90653767	84767933	53978133	206000000	56870267	71970767	96584867	66278300	52819500
	4.32992	2.42642	7.79413	6.43951	2.08758	7.1036			144000000	80282833	60257800	68670467	68642100	35060133	114000000	56154000	45424767	72539433	57507133	32851833
Average	4.2003	2.30036	8.99807	6.62391	2.05609	7.86345		Average	2.58667e+08	1.13313e+08	86090689	95108078	9.28033e+07	48679211	Average	7.13414e+07	64657189	96708100	72715800	4.48584e+07	#DIV/0!
Fold	1.05845	0.579676	2.26746	1.66918	0.518122	1.98154		SD	1.02163e+08	4.69039e+07	2.34394e+07	2.89232e+07	2.90255e+07	1.18908e+07	SD	2.56876e+07	1.68142e+07	2.42305e+07	1.92523e+07	1.05807e+07	#DIV/0!
SD	0.186399	0.109169	1.67884	0.176471	0.278307	1.31582		p-value							p-value
p-value		0.0574	<0.0001	0.0131	0.0291	0.0004		signif							signif
signif		ns	****	*	*	***
C. Hbs1L	HIV	SFL	shSFL	shHbs	shHbs+SFL	shHbs+shSFL		Hbs1L	0-fr	SFL	shSFL	shHbs	shHbs+SFL	shHbs+shSFL
	4.2843	2.23735	10.9159	7.91457	1.88301	9.65881
	3.98668	2.23731	8.28421	7.36978	2.1531	7.35939
	4.32992	2.42642	7.79413	7.34053	2.37613	7.00852
Average	4.2003	2.30036	8.99807	7.54162	2.13741	8.00891		Average	#DIV/0!	#DIV/0!	#DIV/0!	#DIV/0!	#DIV/0!	#DIV/0!
Fold	1.05845	0.579676	2.26746	1.90044	0.538614	2.01819		SD	#DIV/0!	#DIV/0!	#DIV/0!	#DIV/0!	#DIV/0!	#DIV/0!
SD	0.186399	0.109169	1.67884	0.323308	0.246935	1.43959		p-value
p-value		0.0705	<0.0001	0.0014	0.0459	0.0004		signif
signif		ns	****	**	*	***
D. Pelota	HIV	SFL OE	shSFL	shPelo	shPelo+SFL OE	shPelo+shSFL		Pelota	0-fr	SFL OE	shSFL	shPelo	shPelo+SFL OE	shPelo+shSFL
	3.76348	2.31476	9.24719	7.7408	1.96391	7.78243
	4.06289	2.16595	7.88727	8.31954	1.72906	7.64534
	4.0787	2.52788	7.49701	7.1289	2.60023	7.13891
Average	3.96835	2.33619	8.21049	7.72975	2.09773	7.52222
Fold	1	0.588706	2.06899	1.94785	0.528615	1.89555		Average	#DIV/0!	#DIV/0!	#DIV/0!	#DIV/0!	#DIV/0!	#DIV/0!
SD	0.177607	0.181915	0.918769	0.595396	0.450741	0.338965		SD	#DIV/0!	#DIV/0!	#DIV/0!	#DIV/0!	#DIV/0!	#DIV/0!
p-value		0.0086	<0.0001	<0.0001	0.0032	<0.0001		p-value
signif		**	****	****	**	****		signif
E. SMG1	HIV	SFL	shSFL	shSMG1	shSMG1+SFL	shSMG1+shSFL		SMG1	0-fr	SFL OE	shSFL	shSMG1	shSMG1+SFL OE	shSMG1+shSFL
	3.76348	2.31476	9.24719	7.6147	1.97827	7.35914
	4.06289	2.16595	7.88727	8.41126	1.97507	6.86836
	4.0787	2.52788	7.49701	6.47679	2.41356	7.29773
Average	3.96835	2.33619	8.21049	7.50092	2.1223	7.17507		Average	#DIV/0!	#DIV/0!	#DIV/0!	#DIV/0!	#DIV/0!	#DIV/0!
Fold	1	0.588706	2.06899	1.89018	0.534806	1.80807		SD	#DIV/0!	#DIV/0!	#DIV/0!	#DIV/0!	#DIV/0!	#DIV/0!
SD	0.177607	0.181915	0.918769	0.972244	0.252242	0.267395		p-value
p-value		0.0182	<0.0001	<0.0001	0.0082	<0.0001		signif
signif		*	****	****	**	****

## Sheet: Figure 5
mRNA Abundance-GFP in HEK											GAPDH	SFL OE	SFL -/-
	GFP	SFL OE	SFL -/-			GAPDH	SFL -/-	SFL OE			1	0.523	0.488
	1	0.23115	0.94848			1	1.13008	0.65939			1	0.32814	0.80221
	1	0.28149	0.62046			1	0.74678	0.52936			1	0.74678	0.52936
	1	0.17654	0.66159			1	0.64203	0.54552			1	0.64203	0.54552
Avg	1	0.229727	0.74351		Avg	1	0.83963	0.57809		Avg	1	0.559987	0.591273
%red		0.770273	0.25649		%red	0	0.16037	0.42191		%red	0	-44.0013	-40.8727
SD	0	5.24895	17.8697		SD	0	25.6932	7.087		SD	0	0.179577	0.142696
p-value		0.0002	0.0464		p-value		0.393	0.0269		p-value		0.0021	0.0034
Signif		***	*		Signif		ns	*		Signif		**	**
mRNA Abundance SARS2 reporter
	Renilla	SFL OE	SFL -/-			Firefly	SFL OE	SFL -/-			GAPDH	SFL OE	SFL -/-
	1	0.369	0.32034			1	1.232	0.974			1	0.523	0.488
	1	0.01123	0.182			1	1.025	1.4067			1	0.32814	0.80221
	1	0.55183	0.30432			1	0.65954	0.4987			1	0.01375	0.83622
	1	0.04329	0.29609		Avg	1	0.97218	0.9598		Avg	1	0.288297	0.70881
Avg	1	0.243838	0.275687		%red	0	2.782	4.02		%red	0	71.1703	29.119
%red	0	0.756162	0.724313		SD (%)	0	28.9862	45.4167		SD (%)	0	25.6952	19.1982
SD	0	0.261311	0.0632647		p-value		0.9913	0.9819		p-value		0.0059	0.1716
p-value		0.0001	0.0002		Signif		ns	ns		Signif		**	ns
Signif		***	***
mRNA abundance 0-frame
	Renilla	SFL OE	SFL -/-			GAPDH	SFL OE	SFL -/-
	1	0.34098	0.28981			1	1.13	0.08893
	1	0.08747	0.557			1	0.11228	0.11602
	1	0.11464	0.54034			1	0.00125	0.7622
Average	1	0.18103	0.462383		Average	1	0.41451	0.322383
%red	0	0.81897	0.537617		%red	0	0.58549	0.677617
SD (%)		13.9185	14.9685		SD (%)		62.2114	38.1133
p-value		0.0003	0.0025		p-value		0.23	0.1617
Signif		***	**		Signif		ns	ns

## Sheet: Figure 6
	Normal			Cancer			Expr Change				Normal			Cancer			Expr Change
Shiftless	Mean TPM	SD	N	Mean	SD	N	Fold mean	% change	SD % change	PELO	Mean TPM	SD	N	Mean	SD	N	Fold mean	% change	SD % change
Bladder (BLCA)	19.348	3.79143	9	12.0957	7.4545	432	0.625167	-37.4833		Bladder (BLCA)	8.11756	2.74873	9	5.63908	2.78429	432	0.694677	-30.5323
Breast	18.4061	6.58422	181	7.72259	5.20291	1253	0.419568	-58.0432		Breast	6.80022	2.68622	181	5.89393	2.23366	1253	0.866726	-13.3274
Colon	23.3661	9.23839	141	5.81178	4.24628	543	0.248727	-75.1273		Colon	10.223	3.55647	141	4.24754	2.27243	543	0.415487	-58.4513
Kidney (RCC)	20.4181	15.4679	28	8.76544	5.70965	615	0.429297	-57.0703		Kidney (RCC)	5.93957	3.33621	28	10.3531	3.86585	615	1.74307	74.307
Liver	68.5139	24.4859	110	19.1213	11.5772	422	0.279086	-72.0914		Liver	4.98064	2.98597	110	4.06046	2.50323	422	0.815247	-18.4753
Lung (MESO)	28.0186	10.7421	295	14.384	6.31104	87	0.513374	-48.6626		Lung (MESO)	11.3855	4.21164	295	7.98263	2.85155	87	0.701125	-29.8875
Lung (LUAD)	28.0186	10.7421	295	8.37876	4.99085	598	0.299043	-70.0957		Lung (LUAD)	11.3855	4.21164	295	7.57813	3.55137	598	0.665597	-33.4403
Prostate	30.5181	10.4548	100	6.63166	3.42954	556	0.217302	-78.2698		Prostate	7.24761	2.76905	100	5.90062	2.08229	556	0.814147	-18.5853
Skin (SKCM)	9.82553	3.8247	325	12.2379	7.54086	470	1.24552	24.5522		Skin (SKCM)	7.07276	2.01224	325	6.90088	3.13256	470	0.975699	-2.4301
						Avg all	0.475232	-52.4768	31.8166							Avg all	0.854642	-14.5358	36.8281
									11.0331
	Normal			Cancer			Expr Change				Normal			Cancer			Expr Change
SMG1	Mean TPM	SD	N	Mean	SD	N	Fold mean	% change		GAPDH	Mean TPM	SD	N	Mean	SD	N	Fold mean	% change
Bladder (BLCA)	15.7293	1.64466	9	7.6466	4.20113	432	0.486136	-51.3864		Bladder (BLCA)	340.3	111.37	9	979.11	631.85	432	2.8772	187.72
Breast	11.8618	3.05548	181	13.7866	7.58706	1253	1.16227	16.2268		Breast	174.13	66.94	181	740.89	554.64	1253	4.25481	325.481
Colon	13.2065	3.61172	141	6.86759	4.78607	543	0.520017	-47.9983		Colon	272.45	86.49	141	853.18	533.21	543	3.13151	213.151
Kidney (RCC)	6.48096	4.06254	28	8.26569	4.25268	615	1.27538	27.5379		Kidney (RCC)	240.79	161.2	28	1293.38	696.79	615	5.3714	437.14
Liver	5.53644	2.0077	110	3.39352	2.33702	422	0.612944	-38.7056		Liver	175.75	155.41	110	509.53	390.24	422	2.89917	189.917
Lung (MESO)	11.9651	3.26109	295	7.88192	3.67759	87	0.658744	-34.1256		Lung (MESO)	215.1	114.32	295	1178.87	679.64	87	5.48057	448.057
Lung (LUAD)	11.9651	3.26109	295	7.86035	4.72708	598	0.656941	-34.3059		Lung (LUAD)	215.1	114.32	295	704.52	544.21	295	3.27531	227.531
Prostate	12.2139	3.16704	100	7.59176	4.06215	556	0.621565	-37.8435		Prostate	182.5	108.22	100	440.76	193.61	556	2.41512	141.512
Skin (SKCM)	18.3926	5.05511	325	8.0574	3.94756	470	0.438077	-56.1923		Skin (SKCM)	287.44	118.65	325	1655.64	1018.63	470	5.75995	475.995
						Avg all	0.714675	-28.5325	29.7245							Avg all	3.94056	294.056
#NAME?	Normal			Cancer			Expr Change				Normal			Cancer			Expr Change
RER1	Mean TPM	SD	N	Mean	SD	N	Fold mean	% change		ZNF598	Mean TPM	SD	N	Mean	SD	N	Fold mean	% change
Bladder (BLCA)	32.72	8.096	9	26.74	11.21	432	0.817237	-18.2763		Bladder (BLCA)	15.4013	4.05256	9	11.6	5.29792	432	0.753183	-24.6817
Breast	24.725	6.971	181	25.675	10.72	1253	1.03842	3.84226		Breast	14.3729	3.70809	181	12.0568	6.25968	1253	0.838859	-16.1141
Colon	36.187	8.2	141	17.683	10.95	543	0.488656	-51.1344		Colon	19.6212	68.5914	141	13.596	8.21475	543	0.692925	-30.7075
Kidney (RCC)	25.556	13.854	28	29.17	9.302	615	1.14141	14.1415		Kidney (RCC)	7.62782	4.20662	28	6.00332	2.38323	615	0.787029	-21.2971
Liver	31.48	8.818	110	24.705	10.1507	422	0.784784	-21.5216		Liver	8.6865	2.65787	110	7.51616	4.25295	422	0.865269	-13.4731
Lung (MESO)	26.272	9.131	295	29.043	10.714	87	1.10547	10.5474		Lung (MESO)	16.7722	18.2086	295	16.2827	5.47044	87	0.970815	-2.91851
Lung (LUAD)	26.272	9.131	295	25.94	11.679	598	0.987363	-1.2637		Lung (LUAD)	16.7722	18.2086	295	10.837	5.68113	598	0.646127	-35.3873
Prostate	42.136	7.17	100	40.005	13.02	556	0.949426	-5.05743		Prostate	17.2615	5.97592	100	11.1238	4.02392	556	0.644425	-35.5575
Skin (SKCM)	23.89	7.28	325	30.566	12.38	470	1.27945	27.9447		Skin (SKCM)	27.7417	8.46846	325	17.5665	7.58052	470	0.633218	-36.6782
							0.954692	-4.53084	23.3486								0.759094	-24.0906
	Normal			Cancer			Expr Change				Normal			Cancer			Expr Change
PCBP1	Mean TPM	SD	N	Mean	SD	N	Fold mean	% change		HNRPL	Mean TPM	SD	N	Mean	SD	N	Fold mean	% change
Bladder (BLCA)	237.28	50.97	9	238.29	84.85	432	1.00426	0.425657		Bladder (BLCA)	0.358444	0.576752	9	84.0796	50.571	432	234.568	23356.8
Breast	214.15	41.04	181	246.44	72.04	1253	1.15078	15.0782		Breast	4.98458	7.54097	181	82.6807	43.6819	1253	16.5873	1558.73
Colon	229.807	68.69	141	177.93	89.84	543	0.774258	-22.5742		Colon	4.32987	7.24645	141	60.5624	61.2651	543	13.9871	1298.71
Kidney (RCC)	123.3	55.41	28	275.78	103.75	615	2.23666	123.666		Kidney (RCC)	5.73214	6.43929	28	57.1724	27.6456	615	9.974	897.4
Liver	121.99	51.64	110	182.52	74.47	422	1.49619	49.6188		Liver	3.14012	5.6032	110	35.3062	25.2034	422	11.2436	1024.36
Lung (MESO)	230.592	59.21	295	243.197	63.07	87	1.05466	5.46632		Lung (MESO)	7.08211	9.93805	295	47.2301	22.6046	87	6.66893	566.893
Lung (LUAD)	230.592	59.21	295	221.707	73.099	598	0.961468	-3.85317		Lung (LUAD)	7.08211	9.93805	295	77.8793	41.5553	598	10.9966	999.662
Prostate	138.93	38.35	100	199.97	56.885	556	1.43936	43.9358		Prostate	3.19309	6.67628	100	63.1418	33.5109	556	19.7745	1877.45
Skin (SKCM)	185.956	37.615	325	278.55	80.325	470	1.49794	49.7937		Skin (SKCM)	9.75166	14.1725	325	77.3498	34.5887	470	7.93196	693.196
							1.29062	29.0619	43.7972								36.8591	3585.91	7425.54
